1 **The role of water mobility in protein misfolding**

2 Amberley D. Stephens<sup>1</sup>, Johanna Kölbl<sup>1</sup>, Rani Moons<sup>2</sup>, Michael T. Ruggiero<sup>1,3</sup>, Najet Mahmoudi<sup>4</sup>, Talia  
3 A. Shmool<sup>1</sup>, Thomas M. McCoy<sup>1</sup>, Daniel Nietlispach<sup>5</sup>, Alexander F. Routh<sup>1</sup>, Frank Sobott<sup>6,2</sup>, J. Axel  
4 Zeitler<sup>1</sup>, Gabriele S. Kaminski Schierle<sup>1\*</sup>

5 <sup>1</sup> Department of Chemical Engineering and Biotechnology, University of Cambridge, UK

6 <sup>2</sup> Department of Chemistry, University of Antwerp, Belgium

7 <sup>3</sup> Current address, Department of Chemistry, University of Vermont, USA

8 <sup>4</sup> ISIS, STFC, Rutherford Appleton Laboratory, UK

9 <sup>5</sup> Department of Biochemistry, University of Cambridge, UK

10 <sup>6</sup> The Astbury Centre for Structural Molecular Biology, University of Leeds, UK

11 \*corresponding author: [gsk20@cam.ac.uk](mailto:gsk20@cam.ac.uk)

12

13 **Abstract**

14 The propensity for intrinsically disordered proteins to aggregate is heavily influenced by their  
15 surrounding environment. Here, we show that the mobility of the surrounding water molecules  
16 directly influences the aggregation rate of  $\alpha$ -synuclein (aSyn), a protein associated with Parkinson's  
17 disease. We observe that the addition of NaCl reduces the mobility of water, while addition of CsI  
18 increases the mobility of water. In turn, this reduces and increases the mobility of aSyn, respectively,  
19 given the change in strength and lifetime of the intermolecular forces. The reduction of aSyn mobility  
20 in the presence of NaCl ions leads to increased aggregation rates, which may be due to aggregation-  
21 competent conformations being stable for longer, thereby increasing the likelihood of establishing  
22 interactions between two adjacent monomers. In contrast, aSyn is more mobile when CsI is dissolved  
23 in the aqueous phase which leads to a reduction of successful monomeric interactions. We thus  
24 highlight the importance of the surrounding environment and describe how ion content can influence  
25 water mobility and the misfolding rate of amyloidogenic proteins, such as aSyn. By modulating the  
26 cellular environment to increase water mobility or finding small molecules to increase protein  
27 dynamics, new therapeutic targets may be found.

28

29 Keywords: protein mobility, reconfiguration rate, amyloid, aggregation, intrinsically disordered  
30 protein, ions, hydration shell, solvation,

31

32

33

## 34 Introduction

35 The majority of proteins cannot function without a solvation shell, and the mobility of this solvation  
36 layer affects rates of conformational change, catalysis and protein/DNA-protein interactions<sup>1-4</sup>.  
37 Solvent interaction is particularly pertinent for intrinsically disordered proteins (IDPs) which have large  
38 solvent accessible areas compared to globular proteins of a similar size<sup>5</sup>. However, it is not currently  
39 clear what role the solvent plays in the misfolding and aggregation of proteins, particularly for IDPs  
40 such as  $\alpha$ -synuclein (aSyn), whose aggregation is a hallmark of synucleinopathies such as Parkinson's  
41 disease. Certainly, water molecules are expelled from the solvation shell for monomer-monomer  
42 interactions, fibril elongation and fibril bundling to occur<sup>6</sup>. Water is an important driving force for  
43 protein folding, but a detailed understanding of the role of water in stabilising IDPs or in destabilising  
44 the protein to influence misfolding and its aggregation propensity is yet to be achieved. Furthermore,  
45 it is well-known that ions influence the hydrogen bond dynamics of water molecules<sup>7-12</sup>. Despite this  
46 being well-known, the influence of salt ions on water mobility within differing cellular environments,  
47 and the subsequent impact this can have on protein misfolding, is currently not fully understood. Here,  
48 we show that the addition of NaCl, comprising two small, high charge density ions, and CsI, comprising  
49 two large, low charge density ions, can increase and decrease the aggregation rate of aSyn,  
50 respectively. Water and aSyn mobility are inextricably linked and increasing water mobility with  
51 addition of CsI subsequently increases the protein mobility which reduces the propensity of aSyn to  
52 aggregate.

## 53 Results

### 54 CsI decreases aSyn aggregation rate whereas NaCl and D<sub>2</sub>O increase aSyn aggregation rate

55 Fibrillisation rates of aSyn in the presence of NaCl and CsI were monitored using a fluorescence based  
56 kinetic assay with the molecule Thioflavin-T (ThT) which fluoresces when intercalated into the  
57 backbone of  $\beta$ -sheet containing fibrils<sup>13,14</sup>. The sigmoidal kinetic curves, representative of nucleation  
58 dependent reactions, show that aggregation of aSyn occurred faster in the presence of NaCl compared  
59 to CsI in H<sub>2</sub>O (Figure 1a, Supplementary Figure 1). Furthermore, upon increasing concentration of NaCl  
60 from 150 mM to 1.5 M, the aSyn aggregation rate increased, as lag time ( $t_{lag}$ ) and time to reach half  
61 maximum fluorescence ( $t_{50}$ ) both decreased (Table 1). Conversely, aggregation of aSyn in the presence  
62 of CsI was slower at 1.5 M than at 150 mM concentrations and significantly slower compared to NaCl.

63 In order to further probe the influence of the solvent on aSyn aggregation, the same experiment was  
64 performed in a D<sub>2</sub>O solvated environment. We observed the same trends as for the H<sub>2</sub>O samples, i.e.  
65 the aggregation rate increased upon addition of NaCl, but decreased upon addition of CsI. Yet, in all

66 samples, the substitution of H<sub>2</sub>O for D<sub>2</sub>O accelerated the aSyn aggregation rate (Figure 1a,b, Table 1).  
67 We investigated the morphology of the resulting aSyn aggregates (Figure 1c,d, Supplementary Figure  
68 2) and the extent of aggregation by the quantity of remaining monomer after the kinetic assays (Table  
69 1, Supplementary Figure 3). The results mostly reflected the observed aggregation endpoints of the  
70 ThT-based assays, but in the CsI containing samples oligomeric species were detected using atomic  
71 force microscopy (AFM) and size exclusion chromatography (SEC) (Figure 1c, Supplementary Figure 3),  
72 and these species may not bind ThT<sup>15</sup>.

73 To investigate early time points in the aggregation pathway, when formation of oligomers cannot be  
74 detected using ThT fluorescence, we used small angle neutron scattering (SANS) to evaluate size and  
75 structure differences of aSyn species. SANS data show that, even at early time points, ~15-19 hours,  
76 aSyn species of larger sizes are already present in NaCl containing solutions (Figure 1e-g,  
77 Supplementary Tables 1 and 2). Using different fitting parameters to analyse the SANS data (discussed  
78 in Supplementary Note 1) we show that there is four times more monomeric aSyn, classified as a  
79 sphere and compared to cylindrical fibrillar structures, present in 1.5 M CsI samples compared to three  
80 times more monomeric aSyn in 1.5 M NaCl in D<sub>2</sub>O samples (Table 2, Supplementary Figure 4). The  
81 combined results suggest that CsI reduces the aggregation rate of aSyn compared to NaCl and that  
82 D<sub>2</sub>O increases the aggregation rate of aSyn compared to H<sub>2</sub>O.

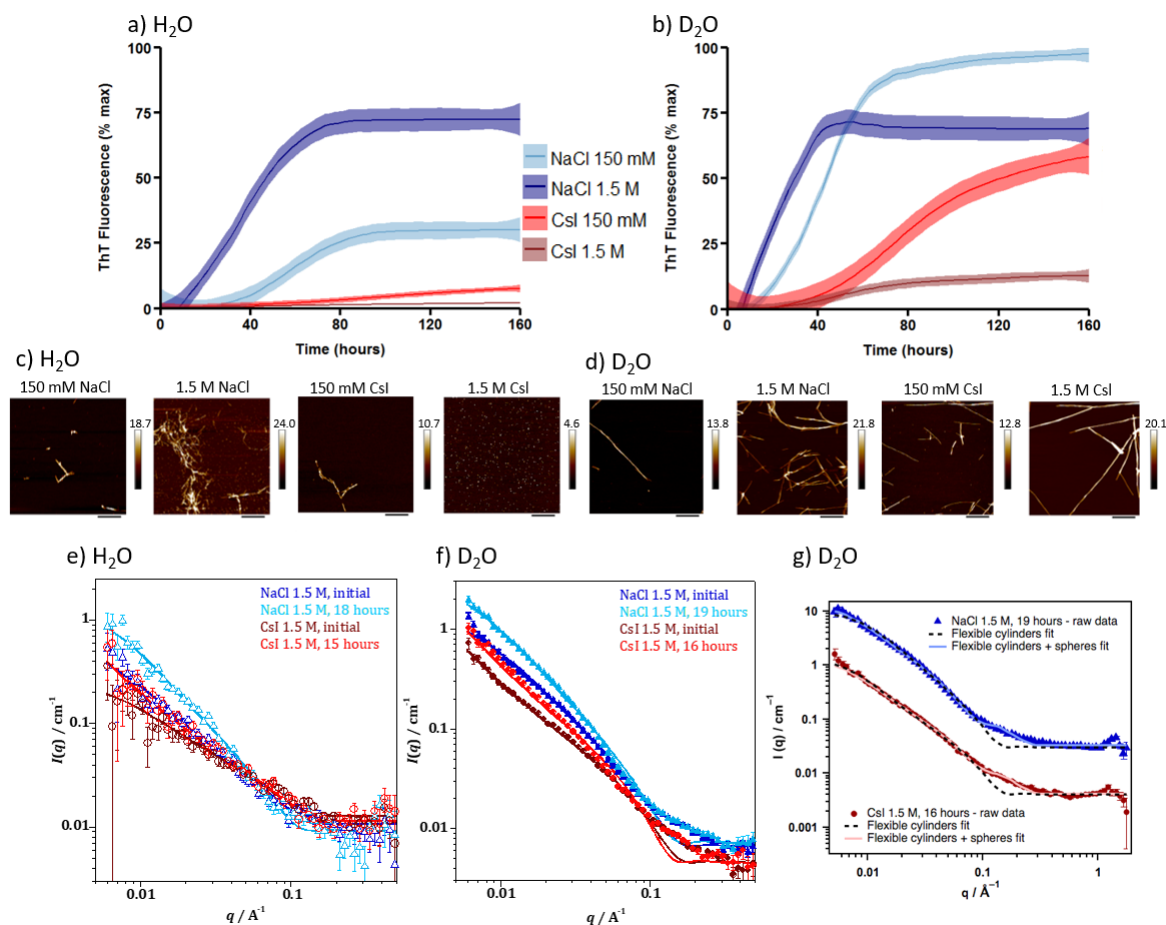

83

84 **Figure 1. NaCl and CsI concentrations influence aSyn aggregation rate and morphology.**

85 aSyn aggregation kinetics were measured in the presence of (a) H<sub>2</sub>O and (b) D<sub>2</sub>O with 150 mM NaCl  
 86 (red), 1.5 M NaCl (brown), 150 mM CsI (light blue), 1.5 M CsI (navy) and plotted as % maximum ThT  
 87 fluorescence over time (Supplementary Figure 1 displays individual plate repeats). Data represent  
 88 three experiments with three or four wells per condition per experiment; error (shaded areas)  
 89 represents rolling average of the SEM. After the ThT-based assays, aSyn was incubated on freshly  
 90 cleaved mica and representative images are shown for aSyn species formed in the presence of NaCl  
 91 and CsI at 150 mM and 1.5 M in (c) H<sub>2</sub>O and (d) D<sub>2</sub>O. Scale bar = 800 nm. For SANS measurements a  
 92 high concentration (434 μM) of aSyn was used to ensure a sufficient number of scatter counts were  
 93 attained. Model fits to the SANS data, using a flexible cylinder model, of aSyn in 1.5 M CsI and NaCl in  
 94 (e) H<sub>2</sub>O and (f) D<sub>2</sub>O after initial mixing and incubation for 15-19 hours. (g) Fittings to a flexible cylinder  
 95 with spheres (pale filled line) described more accurately the data than fitting to a flexible cylinders  
 96 model only (dashed line) using data from aSyn in 1.5 M salts in D<sub>2</sub>O. The NaCl (light blue) is offset by a  
 97 factor of 10 for clarity.

98 **Table 1. Lag time ( $t_{lag}$ ), time to reach half maximum fluorescence ( $t_{50}$ ) and remaining monomer**  
 99 **concentration determined by SEC after performing ThT-based kinetic assays**

| Solvent          | Salt concentration | $t_{lag}$ (hours) | $t_{50}$ (hours) | Remaining Monomer ( $\mu$ M) | % max fluorescence at 160 hours |
|------------------|--------------------|-------------------|------------------|------------------------------|---------------------------------|
| H <sub>2</sub> O | NaCl 150 mM        | 34.3 ± 4.9        | 47.3 ± 11.5      | 12.8 ± 9.0                   | 30.3 ± 14.9                     |
|                  | NaCl 1.5 M         | 31.0 ± 5.1        | 41.0 ± 7.9       | 0                            | 72.6 ± 11.5                     |
|                  | Csl 150 mM         | nd                | nd               | 38.1 ± 7.8                   | 7.9 ± 6.5                       |
|                  | Csl 1.5 M          | nd                | nd               | 35.9 ± 16.6                  | 2.1 ± 1.0                       |
| D <sub>2</sub> O | NaCl 150 mM        | 23.8 ± 4.0        | 45.3 ± 5.2       | 2.0 ± 3.0                    | 98.1 ± 0.9                      |
|                  | NaCl 1.5 M         | 19.0 ± 2.6        | 34.7 ± 7.2       | 0                            | 69.0 ± 15.3                     |
|                  | Csl 150 mM         | 39.3 ± 0.9        | 86.3 ± 6.3       | 11.7 ± 2.7                   | 59.1 ± 25.1                     |
|                  | Csl 1.5 M          | nd                | nd               | 0                            | 12.8 ± 8.2                      |

100 <sup>nd</sup> not determined due to lack of clear ThT response to allow calculations.

101 **Table 2. Parameters of fitting SANS data presented in Figures 2g. These results were obtained using**  
 102 **a flexible cylinder and sphere model where sphere represents monomeric structures and cylinder**  
 103 **fibrillar structures**

| Solvent          | Salt | Time     | Length (nm) | Kuhn length (nm) | Cylinder radius (Å) | Sphere radius (Å) | Cylinder scale factor | Sphere scale factor  |
|------------------|------|----------|-------------|------------------|---------------------|-------------------|-----------------------|----------------------|
| D <sub>2</sub> O | NaCl | 19 hours | 160         | 16.0             | 36.6                | 13.9              | $1.5 \times 10^{-4}$  | $4.7 \times 10^{-4}$ |
| D <sub>2</sub> O | Csl  | 16 hours | 160         | 17.0             | 32.7                | 13.3              | $9.0 \times 10^{-5}$  | $3.6 \times 10^{-4}$ |

104

105

106 **MD simulations show solvated water and aSyn<sub>72-78</sub> peptide mobility is increased in the presence of**  
 107 **Csl, but reduced in the presence of NaCl**

108 Ab initio molecular dynamics (AIMD) simulations can be used to elucidate the dynamics of the  
 109 solvation shell(s), ions, as well as of aSyn<sup>16</sup> on fs to ps timescales. The simulation results performed on  
 110 a crystal structure of seven amino acids (TGVGAGA, residues 72-78) from the central region of aSyn  
 111 highlight that the average velocity of the respective particles remain relatively constant across the  
 112 various simulations. However, the diffusion constants show that the Csl system results in a significantly  
 113 increased diffusion (i.e. further displacement from initial positions) of all of the components of the  
 114 system, and results in a diffusion constant of the aSyn<sub>72-78</sub> peptide of more than double that  
 115 determined for the pure water and NaCl models (Table 3, Figure 2a, Supplementary Video 1 and 2).  
 116 This occurs through significant disruption of the water molecules near the coordination sphere of the  
 117 Cs<sup>+</sup> cation. Due to its large size, a significant perturbation to the water geometries was observed. As a

118 result, large-scale reorganisation of the water molecules occurs upon motion of Cs<sup>+</sup> ions which in turn  
119 leads to considerable shuttling of the water molecules. Given the strong intermolecular interactions  
120 as a result of dispersion, dipole-dipole, hydrogen bonding, and ion-dipole interactions between the  
121 water and aSyn<sub>72-78</sub> peptide molecules this perturbation is coupled strongly to the aSyn<sub>72-78</sub> peptide  
122 molecule and affects the aSyn<sub>72-78</sub> peptide motions to a large spatial extent. It is important to note that  
123 in both the NaCl and CsI simulations, the number of ions within the first solvation shell of the aSyn<sub>72-78</sub>  
124 peptide remain consistent. These data indicate that the presence of these ions could have a great  
125 effect on both the water mobility in the solvation shell and protein mobility *in vitro*. The rate of  
126 dimerisation is directly linked to the rate of protein reconfiguration, where slow reconfiguration allows  
127 for dimerisation to occur, while fast reconfiguration reduces the likelihood of sustainable contacts  
128 that result in successful dimerisation<sup>17</sup>.

129 **Table 3. Diffusion coefficient and average velocity of the aSyn<sub>72-78</sub> peptide, solvated water and non-**  
130 **solvated water calculated using MD simulations**

|                               |       | Diffusion Coefficient<br>(x10 <sup>-9</sup> m <sup>2</sup> /s) | Average Velocity<br>(m/s) |
|-------------------------------|-------|----------------------------------------------------------------|---------------------------|
| aSyn <sub>72-78</sub> peptide | Water | 193.8                                                          | 1595.8                    |
|                               | NaCl  | 195.3                                                          | 1671.9                    |
|                               | CsI   | 402.6                                                          | 1609.5                    |
| Solvated Water                | Water | 550.3                                                          | 1805.6                    |
|                               | NaCl  | 475.5                                                          | 1836.6                    |
|                               | CsI   | 860.4                                                          | 1843.3                    |
| Non-Solvated Water            | Water | 655.5                                                          | 1740.2                    |
|                               | NaCl  | 667.4                                                          | 1792.5                    |
|                               | CsI   | 811.2                                                          | 1767.4                    |

131

132 **The mobility of water increases in bulk and in the solvation shell in the presence of CsI compared to**  
133 **NaCl**

134 Terahertz time-domain spectroscopy can be used as a highly sensitive probe for water mobility in the  
135 liquid state<sup>18,19</sup>. Using THz-TDS measurements in the absence of protein we observe a larger overall  
136 increase in absorption coefficient for solutions containing CsI than in the ones containing NaCl (Figure  
137 2b,c). In line with previous results, samples with protein lead to a reduced absorption coefficient as  
138 the protein displaces the ions and water molecules which have much stronger absorption than the  
139 protein due to the relative number of oscillators (Figure 2b-e)<sup>20,21</sup>.

140 The absorption spectra of aSyn in the two salts were deconvoluted and the absorption coefficient of  
141 the solvation shell surrounding the protein was calculated for a range of different supposed shell sizes

142 and compared to bulk absorption. In bulk, a solution containing CsI absorbs 2.66 times as much as one  
143 containing NaCl (flat black line, Figure 2f). When taking into account that the size of the solvation shell  
144 around the protein, which includes some ions, may depend on the salts, and especially the anions  
145 (calculated by AIMD in Supplementary Figure 5), the solvated protein in a solution containing CsI is  
146 predicted to absorb between 2.7 and 2.9 times as much as one in a solution containing NaCl in the  
147 largest mathematically possible solvation shell, i.e. in the case that solvation shells take up all available  
148 volume. It is found that the larger the assumed solvation shell, the larger its absorption coefficient,  
149 while still being lower than bulk absorption. The absorption in the solvation shell is thus directly  
150 influenced by the interaction of the protein and salts and cannot be explained by the different  
151 absorption of hydrated salt ions only. The absolute difference in absorption upon adding aSyn to a salt  
152 solution is lower in NaCl than in CsI, showing solute mobility in NaCl is lower than CsI.

153 We then investigated the absorption of solvation shell without the influence of the protein in the salt  
154 solutions in a second deconvolution step. As mentioned previously, the protein and shell absorb less  
155 THz radiation than the water-salt solution they replace (Figure 2b-e). To investigate the absorption of  
156 the solvation shell in the presence of the salts we first defined the parameters for salt-independent  
157 absorption, where the aSyn molar absorption coefficient ( $\epsilon_p$ ) is not influenced by the hydration with  
158 different salts. As  $\epsilon_p$  is not known, the salt-independent absorption coefficient of the solvation shell  
159 was calculated based upon protein absorption defined between the upper boundary of  $25 \text{ cm}^{-1}\text{M}^{-1}$ ,  
160 which is comparable to the absorption of aSyn in solid CsI at room temperature, and the lower  
161 boundary value,  $1 \text{ cm}^{-1}\text{M}^{-1}$ , around the limit of detection. Between the two boundaries the ratio of the  
162 absorption of the solvent in the bulk and shell, independent of salt, is the same (Figure 2g).

163 We subsequently investigated the influence of the salt on the solvation shell, independent of the  
164 protein. The shell containing NaCl absorbs less than the bulk above  $\epsilon_p = 5 \text{ cm}^{-1}\text{M}^{-1}$ , whereas the shell  
165 containing CsI only absorbs less than the bulk above  $\epsilon_p = 15 \text{ cm}^{-1}\text{M}^{-1}$  (Figure 2g). If  $\epsilon_p$  is higher than 15  
166  $\text{cm}^{-1}\text{M}^{-1}$ , both shells absorb less than the bulk, but the one containing NaCl even less so than the one  
167 including CsI. This shows that across a physiological range of protein absorption, ion and water  
168 mobility in the vicinity of aSyn are increased in CsI compared to NaCl. This is clearly observed at  $\epsilon_p =$   
169  $10 \text{ cm}^{-1}\text{M}^{-1}$  (shown by the circles in Figure 2g), an intermediate protein absorption coefficient, where  
170 the shell absorption in NaCl is reduced while increased in CsI. Our THz-TDS measurements have shown  
171 that adding the protein disturbs the interaction between water molecules and salt ions, and depends  
172 on the salt ion. This can result in an increase or decrease of mobility in the shell compared to the bulk.

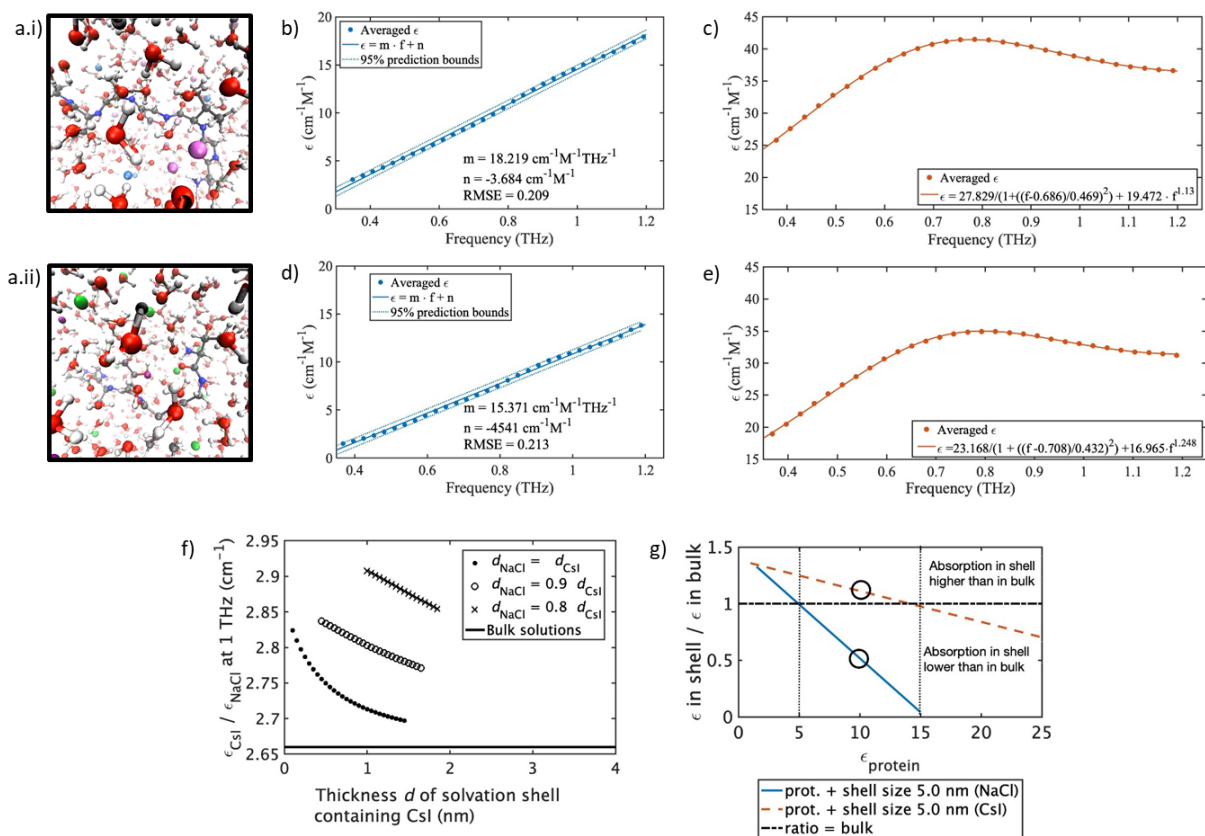

173

174 **Figure 2. Addition of NaCl and CsI alter water mobility in the bulk and in the aSyn solvation shell. A**

175 snapshot of the AIMD simulations of the solvated aSyn<sub>72-78</sub> peptide in a 125 nm<sup>3</sup> box after introduction

176 and equilibration with 1.5 M salts. (a.i) aSyn<sub>72-78</sub> peptide in 1.5 M CsI and (a.ii) aSyn<sub>72-78</sub> peptide in 1.5

177 M NaCl, Cs<sup>+</sup> light purple, I<sup>-</sup> light blue, Na<sup>+</sup> dark purple, Cl<sup>-</sup> green, O red, H white, C grey, N dark blue.

178 The molar absorption coefficient measured with THz-TDS for (b) NaCl solutions, (c) CsI solutions, (d)

179 solutions of NaCl and aSyn, and (e) solutions of CsI and aSyn. (b) and (d) are fitted with a linear function

180 and (c) and (e) with the sum of a power law and a Laurentzian to account for the spectral shape. (f) At

181 1 THz the solvation shell surrounding aSyn containing CsI ( $\epsilon_{CsI}$ ) absorbs more than the shell containing

182 NaCl ( $\epsilon_{NaCl}$ ) and both solvation shells absorb more compared to bulk only (black line at 2.66). The

183 dependency of absorption on the salt is plotted for several possible sizes  $d$  of the solvation shell,

184 allowing a smaller shell size  $d_{NaCl}$  in solutions containing NaCl. The same trend is apparent for all shell

185 sizes. (g) Absorption in the solvation shell excluding the protein itself is compared to bulk absorption

186 at 1 THz. Representative ratio of the absorption in the shell compared to bulk absorption for NaCl

187 (blue line) and CsI (orange, dotted) for varying protein absorption ( $\epsilon_p$ ) between 1-25 cm<sup>-1</sup>M<sup>-1</sup>. The

188 solvation shell with NaCl absorbs less than the bulk (denoted by the black dashed horizontal line)

189 above  $\epsilon_p = 5$  cm<sup>-1</sup>M<sup>-1</sup> (denoted by the black vertical dotted line at 5 cm<sup>-1</sup>M<sup>-1</sup>), while the solvation shell

190 with CsI absorbs less than the bulk above  $\epsilon_p = 15$  cm<sup>-1</sup>M<sup>-1</sup> (denoted by the black dotted vertical line 15

191 cm<sup>-1</sup>M<sup>-1</sup>) at an ion shell size of 5 nm. At  $\epsilon_p = 10$  cm<sup>-1</sup>M<sup>-1</sup>, an intermediate protein absorption coefficient,



192 the shell absorption in NaCl is reduced while increased in CsI (shown by black circles). Other shell sizes  
193 are shown in Supplementary Figure 6.

194

#### 195 **aSyn structure is similar when bound to Na<sup>+</sup> and Cl<sup>-</sup> as Cs<sup>+</sup> and I<sup>-</sup>**

196 We next investigated the possibility of structural differences of aSyn in the presence of NaCl and CsI  
197 to determine whether the difference in aggregation rate could instead be due to a direct interaction  
198 of NaCl or CsI with aSyn. Native nano-electrospray ionisation mass spectrometry (nano-ESI-MS) data  
199 show that aSyn binds a maximum of three Na<sup>+</sup> and five Cs<sup>+</sup> ions at a 1:50 ratio (20 μM aSyn: 1 mM salt)  
200 (Figure 3a) (data for 1:250 ratio is presented in the Supplementary Figure 7 and discussed in  
201 Supplementary Note 2). Binding of the counter anion I<sup>-</sup> and Cl<sup>-</sup> is not observed.

202 <sup>15</sup>N-labelled aSyn was then measured by 2D <sup>15</sup>N HSQC NMR spectroscopy to investigate structural  
203 changes in both 150 mM and 1.5 M CsI and NaCl solutions. The chemical shift spectrum of aSyn  
204 showed few chemical shift changes of residues in 150 mM salt solutions (Figure 3bi), however large  
205 chemical shift changes were observed across all regions of aSyn in 1.5 M salt solutions (Figure 3bii).  
206 Chemical shifts across all regions of aSyn suggest there are no specific binding regions for the ions, but  
207 that salt binding at very high, non-physiological concentrations may induce structural differences.  
208 However, the chemical shift changes observed by NMR display an ensemble measurement, likely  
209 representing the average of all states of aSyn in the salt solutions. As an IDP aSyn resides in many  
210 transient conformations, therefore we cannot clearly determine whether there are shifts in the  
211 distribution of aSyn conformations in the different salt solutions using this method.

212 We hence used nano-ESI-ion mobility-MS (nano-ESI-IM-MS) to investigate potential changes to the  
213 distribution of aSyn conformations when bound to the salt ions. In the ion mobility experiment, the  
214 amount of gas-phase collisions, and therefore the drift time, is directly related to the rotationally  
215 averaged extendedness of the protein ion<sup>22</sup>. Using the 8+ charge state of aSyn in the absence of salt,  
216 we identified four main co-existing conformations in the gas phase (Figure 3c), as previously  
217 reported<sup>23</sup>. The choice of charge state represented is discussed in Supplementary Note 3. The larger  
218 the collision cross sections (CCS), the more extended the protein structures. The binding of ions  
219 induced a shift favouring conformations with higher CCS values (Figure 3c). There were no further  
220 differences in the distribution of the conformational ensembles of aSyn in either salt with increasing  
221 numbers of ions bound or with increasing salt concentrations (Figure 3c, Supplementary Figure 8).  
222 Overall, the aSyn conformational space did not extend or compact drastically, as has been observed  
223 for the binding of some small molecule drugs to aSyn<sup>23</sup>, suggesting that the binding of these

224 monovalent ions is non-specific, similar to what we observe by NMR and what we have observed with  
225 other monovalent ions<sup>24</sup>. At lower charge states, particularly 5+, 6+ and 7+, we observe a slight  
226 difference in the intensity distribution of aSyn conformations in CsI compared to NaCl containing  
227 solutions (Figure 3d). This suggests that there could be differences in the distribution of the structural  
228 ensemble of aSyn in the two salt solutions, however these charge states may represent conformations  
229 that are influenced by the gas phase. Both NMR and nano-ESI-IM-MS data suggest there are no gross  
230 differences in the conformation of aSyn in the presence of CsI or NaCl, but possibly the current  
231 resolution of these methods do not allow us to fully determine different structures in these ensemble  
232 solutions.

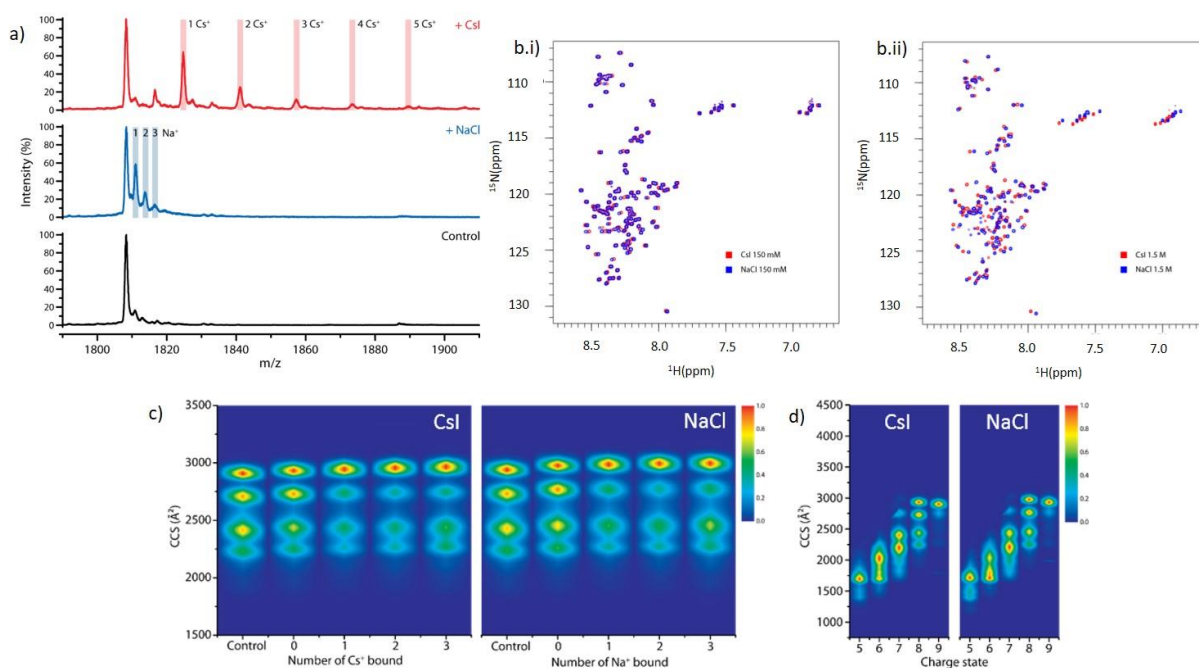

233

234 **Figure 3. aSyn binds more Cs<sup>+</sup> than Na<sup>+</sup> which does not grossly affect aSyn conformation** The mass  
235 spectrum of (a) native aSyn (Control, black) is shown in the 8+ charge state region, and in the presence  
236 of a 1:50 ratio (20 μM aSyn: 1 mM salt) we observe aSyn bound to three Na<sup>+</sup> (+NaCl, blue) and to five  
237 Cs<sup>+</sup> (+CsI, red). (b) 2D <sup>1</sup>H-<sup>15</sup>N HSQC peak spectrum of aSyn containing (b, i) 150 mM CsI (red) in 5% D<sub>2</sub>O,  
238 95% H<sub>2</sub>O (vol/vol) was overlaid with aSyn containing 150 mM NaCl (blue) in 5% D<sub>2</sub>O, 95% H<sub>2</sub>O (vol/vol).  
239 (b, ii) aSyn with 1.5 M NaCl (red) (vol/vol) was overlaid with aSyn containing 1.5 M CsI (blue). Gross  
240 shift perturbations are only observed across the protein sequence under very high (1.5 M) salt  
241 concentrations. (c) Heat maps of the aSyn conformations detected for the 8+ charge state of aSyn  
242 without salt present and in the presence of 1 mM NaCl/CsI in a 1:50 protein:salt ratio, and displayed  
243 in the absence of ions (Control), in the presence of ions but not binding (0), and as a function of the

244 number of cations bound (1, 2, 3). (d) Heat maps of the conformations of aSyn detected at different  
245 charge states (5+ to 9+) in the presence of 1 mM NaCl/CsI using a 1:50 protein:salt ratio.

246

### 247 ***In vitro* aSyn is more mobile in CsI than in NaCl**

248 We finally examined the mechanism of altered solvent mobility on the aggregation propensity of aSyn.  
249 MD simulations indicated that the altered water mobility in the solvation shell and the mobility of the  
250 aSyn<sub>72-78</sub> peptide backbone were inextricably linked, and the mobility of the aSyn<sub>72-78</sub> peptide chain in  
251 CsI solution was reduced compared to in NaCl. We therefore examined the rate of the conformational  
252 rearrangement of aSyn in the two salts using <sup>15</sup>N HSQC NMR spectroscopy and THz-TDS. Both  
253 techniques showed that aSyn in NaCl had reduced mobility compared to aSyn in CsI. The mobility of  
254 <sup>15</sup>N-labelled aSyn was expressed through the signal intensity of the individual aSyn residues, the lower  
255 signal intensity of aSyn in the 1.5 M CsI solution is related to the protein being more mobile in CsI on  
256 a timescale that leads to a reduction in signal intensity compared to the NaCl solution (Figure 4a). At  
257 the lower salt concentration at 150 mM the difference in mobility was smaller, but still observed  
258 (Supplementary Figure 9). Furthermore, we observe that most of the protein sequence is influenced  
259 by the presence of NaCl and CsI as there are no specific binding sites or regions for the ions present,  
260 which may lead to more localised intensity changes, and region-specific peak shifts in the spectra for  
261 which none have been observed (Figure 4b). The N-terminal residues 1-20 were less influenced by the  
262 salt ions and were more similar in intensity.

263 Temperature ramping with THz-TDS showed that a solid state sample of aSyn and CsI had a secondary  
264 glass transition temperature at  $T_{g,\beta} = 174$  K while for aSyn and NaCl  $T_{g,\beta} = 192$  K. The glass transition at  
265  $T_{g,\beta}$  is associated with the onset of local mobility of the sample<sup>25</sup> and aSyn samples containing CsI  
266 become mobile at a lower temperature than aSyn samples containing NaCl (Figure 4b, Table 4).  
267 Furthermore, the gradient of the slope at temperatures below  $T_{g,\beta}$ , which represents a measure of  
268 inherent molecular mobility, is steeper for aSyn and CsI ( $m = 0.12 \text{ cm}^{-1} \text{ K}^{-1}$ ) than aSyn and NaCl ( $m =$   
269  $0.02 \text{ cm}^{-1} \text{ K}^{-1}$ ) indicating that aSyn with CsI is more mobile than for aSyn with NaCl. The aSyn and NaCl  
270 sample displays a second transition temperature,  $T_{g,\alpha} = 254$  K, which refers to large scale mobility  
271 attributed to cooperative motions of the sample (Figure 4c, Table 4). No distinct  $T_{g,\alpha}$  was observed for  
272 the aSyn sample containing CsI indicating that there is sufficiently high mobility already present at  
273 lower temperatures, hence the cooperative motions gradually emerge at temperatures above  $T_{g,\beta}$   
274 instead of being associated with a defined transition point. The THz-TDS data are in agreement with  
275 our NMR data which show that aSyn samples containing CsI are more mobile and able to reconfigure  
276 than aSyn samples containing NaCl.

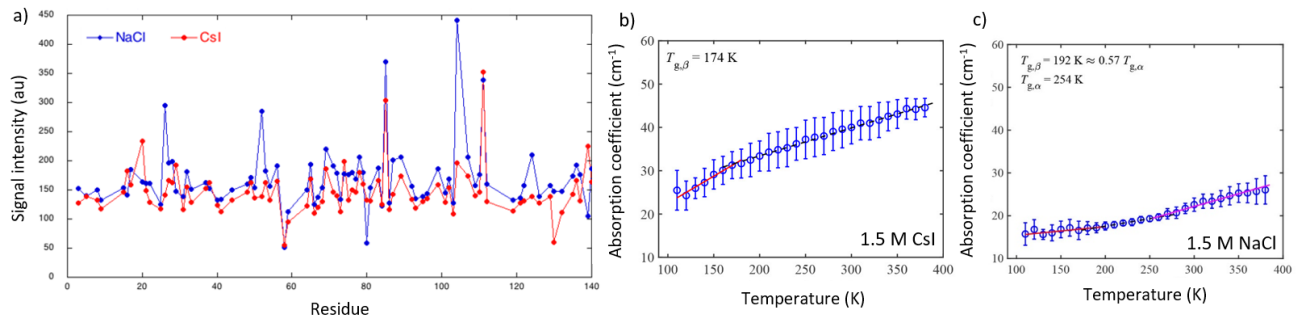

277

278 **Figure 4. NMR and THz-TDS show that aSyn is more mobile in CsI compared to NaCl.**

279 (a) HSQC NMR spectroscopy was used to measure the intensity of 150  $\mu\text{M}$   $^1\text{H}$  and  $^{15}\text{N}$ -labelled aSyn  
 280 in 95%  $\text{H}_2\text{O}$ , 5%  $\text{D}_2\text{O}$  (vol/vol) containing 1.5 M CsI (red) and NaCl (blue). The signal intensity for aSyn  
 281 is displayed for each salt with 86% residue coverage. Each residue covered is represented by a dot.  
 282 aSyn samples containing CsI had an overall lower intensity across most of the protein sequence. The  
 283 mean terahertz absorption coefficient as a function of temperature at 1 THz is shown for (b) aSyn and  
 284 1.5 M CsI and (c) aSyn and 1.5 M NaCl. Lines indicate the different linear fits of the respective regions.  
 285 Error bars represent the standard deviation of 3 measurements.

286 **Table 4. Gradient,  $m$ , of the linear fit ( $y = mx+c$ ) and respective glass transition**  
 287 **temperatures determined using THz-TDS**

| Sample      | Region 1<br>( $\text{cm}^{-1} \text{K}^{-1}$ ) | Region 2<br>( $\text{cm}^{-1} \text{K}^{-1}$ ) | Region 3<br>( $\text{cm}^{-1} \text{K}^{-1}$ ) | $T_{g,\beta}$<br>(K) | $T_{g,\alpha}$<br>(K) |
|-------------|------------------------------------------------|------------------------------------------------|------------------------------------------------|----------------------|-----------------------|
| aSyn + CsI  | $0.12 \pm 0.01$                                | $0.067 \pm 0.001$                              | -                                              | 174                  | -                     |
| aSyn + NaCl | $0.02 \pm 0.01$                                | $0.035 \pm 0.001$                              | $0.059 \pm 0.01$                               | 192                  | 254                   |

288

## 289 Discussion

290 The influence of ions on the mobility of water has been well studied, yet the effect of water mobility  
 291 on the propensity of proteins to misfold is still not elucidated and in particular, not in connection with  
 292 IDPs and amyloid fibril formation. Here, we show that ions can influence the mobility of bulk water,  
 293 water in the solvation shell and protein mobility, and that the dynamics of the aqueous phase governs  
 294 aggregation rates. The trend for increased aSyn aggregation rate in NaCl compared to CsI is observed  
 295 in both  $\text{H}_2\text{O}$  and in  $\text{D}_2\text{O}$ , yet the aggregation rates of aSyn were faster in  $\text{D}_2\text{O}$ . This suggests the direct  
 296 effect on aggregation comes from the solvent and that the ions can influence the solvent. The  
 297 presence of deuterium bonds, which are stronger and shorter than hydrogen bonds<sup>26,27</sup>, may increase  
 298 aggregation propensities of proteins<sup>28-32</sup>. We directly observe that the presence of CsI leads to  
 299 increased water mobility, both in bulk and in the protein solvation shell, in comparison to NaCl. An

300 increase in absorption as measured with THz-TDS directly relates to an increased change in dipole  
301 moment and therefore ion and protein mobility which are inextricably linked to the mobility of  
302 surrounding water molecules.

303 Although direct ion binding has been proposed to influence aSyn aggregation rates, the ion binding  
304 strength does not correlate with aggregation rates observed<sup>33</sup>, suggesting that the Hofmeister series  
305 may not be the only explanation for why these ions either decrease or increase aSyn aggregation  
306 kinetics. Furthermore, we can exclude the Debye-Hückel effect as both NaCl and CsI are monovalent;  
307 if such a charge screening effect was dominant, a similar effect on the aggregation kinetics of aSyn  
308 should have been observed. Structural alterations to the dynamic ensemble of aSyn conformations by  
309 NaCl and CsI, which may favour aggregation prone conformations, cannot be ruled out. Although we  
310 observed no gross differences in the structures of aSyn by NMR and MS in the presence of NaCl and  
311 CsI, these techniques may not be sensitive enough on the timescale needed to identify differences in  
312 transient dynamic interactions within the monomer structures in solution. Yet, these dynamic  
313 interactions govern whether a protein remains monomeric or misfolds into conformations that can  
314 aggregate. The surrounding solvent dictates the time scale for forming and maintaining these  
315 conformations.

316 IDPs rely on their ability to be highly dynamic and flexible to probe different conformational space  
317 allowing maintenance of their solubility and function. When the reconfiguration rates of the protein  
318 backbone are retarded this can lead to aggregation<sup>17,34-38</sup>. For protein association and aggregation to  
319 occur, the proteins must firstly be in an aggregation prone conformation, and secondly must be stable  
320 for long enough for interactions to occur. Our data support a mechanism whereby the pathway to  
321 oligomerisation and aggregation is determined by the intramolecular diffusion rate of the protein,  
322 which we show is determined by the mobility of, and intermolecular interactions with, the  
323 surrounding water, which in turn is modulated by of ions present (Figure 5). These data may have  
324 important implications for aSyn localised within certain environments either inside or outside of a cell,  
325 where ion concentrations can differ greatly<sup>39,40</sup>. The presence of ions during the formation of the yeast  
326 prion protein oligomers, but not during elongation, can influence fibril polymorphism and is directly  
327 linked to pathology<sup>41,42</sup>. Therefore, interesting questions arise regarding cell specific or age dependent  
328 accumulation of certain ions or metabolites in the intracellular aqueous environment that could alter  
329 water mobility and influence aSyn strain polymorphism and disease outcome.

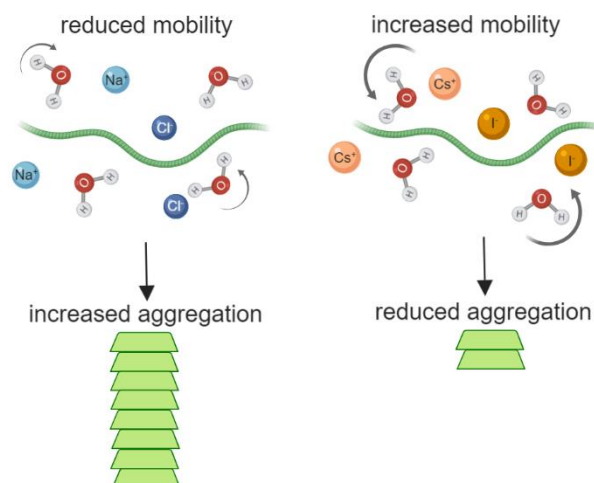

330 **Figure 5. Aggregation kinetics of aSyn are dependent on water mobility which is strongly affected**  
331 **by the presence of ions.** Presence of Na<sup>+</sup> (light blue) and Cl<sup>-</sup> (dark blue) lead to reduced mobility of  
332 water (H<sub>2</sub>O) and aSyn monomers (green protein), allowing the formation of stable intermolecular  
333 bonds between two adjacent monomers which can lead to aggregation into aSyn amyloid fibrils  
334 (stacked green protein). Presence of Cs<sup>+</sup> (light orange) and I<sup>-</sup> (dark orange) lead to increased mobility  
335 of water and aSyn monomer, which decreases the likelihood of two monomers being stable enough  
336 to permit intermolecular interactions and thus results in reduced aggregation.

337

## 338 **Methods and Materials**

### 339 **Purification of aSyn**

340 Human wild-type (WT) alpha-synuclein was expressed using plasmid pT7-7. The plasmid was heat  
341 shocked into *Escherichia coli* One Shot<sup>®</sup> BL21 STAR<sup>™</sup> (DE3) (Invitrogen, Thermo Fisher Scientific,  
342 Cheshire, UK) and purified as previously described<sup>43</sup>. Recombinant aSyn was purified using ion  
343 exchange chromatography (IEX) in buffer A (10 mM Tris, 1 mM EDTA pH 8) against a linear gradient of  
344 buffer B (10 mM Tris, 1 mM EDTA, 0.5 M NaCl pH 8) on a HiPrep Q FF 16/10 anion exchange column  
345 (GE Healthcare, Uppsala, Sweden). aSyn was then dialysed into buffer C (1 M (NH<sub>4</sub>)<sub>2</sub>SO<sub>4</sub>, 50 mM Bis-  
346 Tris pH 7) and further purified on a HiPrep Phenyl FF 16/10 (High Sub) hydrophobic interaction  
347 chromatography (HIC) column (GE Healthcare) and eluted against buffer D (50 mM Bis-Tris pH 7).  
348 Purification was performed on an ÄKTA Pure (GE Healthcare). aSyn was extensively dialysed against  
349 H<sub>2</sub>O and used immediately for experiments or dialysed against 20 mM Tris pH 7.2 and concentrated  
350 using 10 k MWCO amicon centrifugal filtration devices (Merck KGaA, Darmstadt, Germany) and stored  
351 at -80 °C until use. aSyn in Tris was buffer exchanged into freshly prepared NaCl and CsI solutions (pH  
352 5.4) before experiments using PD10 dialysis columns (GE Healthcare). Protein concentration was

353 determined from the absorbance measurement at 280 nm on a Nanovue spectrometer using the  
354 extinction coefficient for aSyn of 5960 M<sup>-1</sup>cm<sup>-1</sup>.

355 Protein purity was analysed using analytical reversed phase chromatography (aRP). Each purification  
356 batch was analysed using a Discovery BIO Wide Pore C18 column, 15cm x 4.6mm, 5µm, column with  
357 a guard cartridge (Supelco by Sigma-Aldrich, St. Louis, MO, USA) with a gradient of 95 % to 5 % H<sub>2</sub>O +  
358 0.1% trifluoroacetic acid (TFA) or acetic acid and acetonitrile + 0.1% TFA or acetic acid at a flow-rate of  
359 1 mL/min. The elution profile was monitored by UV absorption at 220 nm and 280 nm on an Agilent  
360 1260 Infinity HPLC system (Agilent Technologies LDA, Santa Clara, USA) equipped with an autosampler  
361 and a diode-array detector. Protein purity fell between 88 - 95 % dependent on batch (Supplementary  
362 Figure 10).

### 363 **Thioflavin-T based assays**

364 aSyn samples were buffer exchanged into 150 mM NaCl, 1.5M NaCl, 150 mM CsI or 1.5 M CsI in H<sub>2</sub>O  
365 or D<sub>2</sub>O prior to performing experiments using PD10 desalting columns (GE Healthcare). 10 µM freshly  
366 made ThT (abcam, Cambridge, UK) was added to 50 µL of 50 µM aSyn. All samples were loaded onto  
367 nonbinding, clear bottom, 365-well black plates (Greiner Bio-One GmbH, Kremsmünster, Austria). The  
368 plates were sealed with a SILVERseal aluminium microplate sealer (Grenier Bio-One GmbH).  
369 Fluorescence measurements were taken using a FLUOstar Omega plate reader (BMG LABTECH GmbH,  
370 Ortenberg, Germany). The plates were incubated at 37 °C with orbital shaking at 300 rpm for five  
371 minutes before each read every hour. Excitation was set at 440 nm with 20 flashes and the ThT  
372 fluorescence intensity was measured at 480 nm emission with a 1300 gain setting. ThT assays were  
373 repeated at least three times using at least three wells for each condition. Data were normalised to  
374 the well with the maximum fluorescence intensity for each plate and the average was calculated for  
375 all experiments. Data are displayed with the rolling average from three experiments calculated using  
376 the program R (<https://www.r-project.org/>) with a 0.5 span. A linear trend line fitted along the  
377 exponential phase region of the ThT fluorescence curve was used to calculate the lag time (t<sub>lag</sub>) using  
378 equation 1.

$$379 \quad y = ax - b \quad (1)$$

### 380 **Determination of remaining monomer concentration of aSyn after ThT-based assays using** 381 **analytical size exclusion chromatography**

382 To calculate the remaining aSyn monomer concentration in each well after ThT-based assays size  
383 exclusion chromatography performed on a high-pressure liquid chromatography (SEC) system was  
384 used. The contents of each well after the ThT-based assay were centrifuged at 21k x g for 20 minutes

385 and the supernatant from each well was added to individual aliquots in the autosampler of the Agilent  
386 1260 Infinity HPLC system (Agilent Technologies). 35  $\mu\text{L}$  of each sample was injected onto an Advance  
387 Bio SEC column, 7.8 x 300 mm 130 $\text{\AA}$  (Agilent Technologies) in 20 mM Tris pH 7.2 at 1 mL/min flow-  
388 rate. The elution profile was monitored by UV absorption at 220 and 280 nm. A calibration curve of  
389 known concentrations of aSyn was used to calculate the remaining monomer concentration of aSyn  
390 in each well. Six wells from two experiments were analysed for remaining monomer concentrations,  
391 the average value of each measurement is presented including the standard error of the mean (SEM).

### 392 **Atomic Force Microscopy**

393 The contents of wells from the ThT-based assays were centrifuged for 20 minutes at 21 k x g. 40  $\mu\text{L}$  of  
394 supernatant was removed to leave 10  $\mu\text{L}$  and remaining fibrils. The fibrils were resuspended and  
395 incubated on a freshly cleaved mica surface for 20 min. The mica was washed three times in 18.2  $\Omega$   
396 dH<sub>2</sub>O to remove loose protein. Images were acquired in dH<sub>2</sub>O using tapping mode on a BioScope  
397 Resolve (Bruker GmbH, Karlsruhe, Germany) using 'ScanAsyst-Fluid+' probes. 256 lines were acquired  
398 at a scan rate of 0.966 Hz per image with a field of view of 2-5  $\mu\text{m}$  and for at least six fields of view.  
399 Images were adjusted for contrast and exported from NanoScope Analysis 8.2 software (Bruker).

### 400 **Small Angle Neutron Scattering**

401 Small-angle neutron scattering (SANS) measurements were performed on the SANS2D instrument at  
402 the ISIS Neutron AND Muon Source (STFC Rutherford Appleton Laboratory, Didcot, UK). 6.25 mg of  
403 freeze-dried aSyn was dissolved in a salt solution containing 1.5 M NaCl or CsI in Milli-Q 18.2 water  
404 or pure deuterated water to give a final concentration of 434  $\mu\text{M}$ . The protein solution was left stirring  
405 in a cooling cabinet for 0.5 h in H<sub>2</sub>O salt solutions, whereas for D<sub>2</sub>O salt solutions it was left for 1.5 h  
406 to allow for sufficient hydrogen/deuterium exchange. Samples were then loaded into quartz circular  
407 cells of 1 mm (H<sub>2</sub>O samples) and 2 mm (D<sub>2</sub>O samples) pathlength and measurements were made at  
408 room temperature. The protein solutions were also measured 15 to 19 hours after preparation.

409 An incident beam of 12 mm diameter, a wavelength range of 1.75–16.5  $\text{\AA}$ , and a setup of  $L_1 = 4\text{ m}$ ;  $L_2$   
410  $= 4\text{ m}$ , was used resulting in an effective range of wave vector in equation 2,

$$411 \quad q = \frac{4\pi}{\lambda} \sin(\theta/2), \quad 0.005 \leq q \leq 0.7 \text{ \AA}^{-1} \quad (2)$$

412 where  $\lambda$  = the neutron wavelength and  $\theta$  = the scattering angle. Raw scattering data are corrected for  
413 sample transmission, detector efficiency and solvent background scattering (as described in detail in<sup>44</sup>)  
414 using the Mantid Software, and then converted to absolute scattering cross section ( $I(q) / \text{cm}^{-1}$ ) using  
415 the scattering from a standard sample (comprising a solid blend of hydrogenous and perdeuterated  
416 polystyrene) in accordance with established procedures<sup>45</sup>.

417 Modelling of the data was performed in SASView (<http://www.sasview.org>), using the Guinier–Porod



418 model<sup>46</sup>. The scattering intensity,  $I(q)$ , is derived from independent contributions of the Guinier form  
419 in equation 3,

$$420 \quad I(q) = \frac{G}{Q^s} \exp\left(\frac{-q^2 R_g^2}{3-s}\right) \text{ for } q \leq q_1 \quad (3)$$

421 and the Porod form, in equation 4

$$422 \quad I(q) = \frac{D}{Q^d} \text{ for } q \geq q_1 \quad (4)$$

423 where  $q$  is the the scattering variable,  $R_g$  is the the radius of gyration,  $d$  is the the Porod exponent, and  
424  $G$  and  $D$  are the Guinier and Porod scale factors respectively. A dimensionality parameter ( $3 - s$ ) is  
425 included in the Guinier form factor to help define non-spherical objects where  $s = 0$  represents spheres  
426 or globules,  $s = 1$  represents cylinders or rods and  $s = 2$  represents lamellae or platelets.

#### 427 **Ab Initio Molecular Dynamics (AIMD)**

428 The CP2k software package was used for all AIMD simulations, which incorporated three-dimensional  
429 periodic boundary conditions<sup>47,48</sup>. The simulations made use of the Perdew-Burke-Ernzerhof (PBE)  
430 density functional<sup>49</sup> coupled with the dispersion correction of Grimme<sup>50,51</sup>. The electronic wave  
431 functions were represented using the double-zeta DZVP basis set<sup>47</sup>. Simulations were performed  
432 within the canonical ensemble (NVT), with the temperature maintained at 300 K using a Nose-Hoover  
433 chain thermostat<sup>52-54</sup>. The crystal structure of seven amino acids, TGVGAGA residues 72-78 of aSyn,  
434 was taken from the protein database for simulations<sup>55</sup>. The initial model was generated by fully  
435 solvating the aSyn peptide with water molecules explicitly in a 125 nm<sup>3</sup> simulation box. Ions were  
436 introduced to a concentration of 1.5 M to match the experiment. The simulations were equilibrated  
437 for 5 ps prior to performing the production MD runs over a 45 ps trajectory (50 ps total), with a time  
438 step of 1.0 fs.

#### 439 **Terahertz spectroscopy in liquid**

440 aSyn was dialysed extensively against H<sub>2</sub>O to remove salts after purification. The samples were snap  
441 frozen in liquid nitrogen and lyophilised using a LyoQuest 85 freeze-dryer (Telstar, Spain). The aSyn  
442 samples were resuspended at a concentration of 691.56  $\mu$ M (10 mg/mL). 10 mM Tris pH 7.2 was added  
443 to the samples to aid reconstitution. Samples were reconstituted in the salts and sonicated for 10 s on  
444 and 10 s off for three times before THz measurements. The liquid was injected into a liquid cell with a  
445 path length of 100  $\mu$ m. Reference measurements of buffer were performed using the same liquid cell.  
446 THz-TDS spectra were acquired using a commercial TeraPulse 4000 instrument with a spectral range  
447 of 0.2–2.7 THz (TeraView, Cambridge, UK). The temperature was kept constant at 294 K. The

448 absorption coefficient of the liquid samples was calculated in the same way as that of solid samples.  
449 Measurements were repeated at least 5 times. Buffer and salt solutions were measured in 0.25 M  
450 increments for NaCl concentrations of 0.5 to 4 M, and for CsI concentrations of 0.25 to 2.5. aSyn in  
451 NaCl was measured at 2 M, as aSyn did not reconstitute successfully in concentrations below 2 M, and  
452 aSyn in CsI was measured at 1.25, 1.5, and 2 M. All spectra were subsequently divided by the salt  
453 concentration to obtain the molar absorption coefficient  $\epsilon$ .  $\epsilon$  was then fitted over frequencies with a  
454 linear function for samples containing NaCl. In samples containing CsI a spectral feature appeared at  
455 0.7 THz and  $\epsilon$  was therefore fitted with the sum of a power law and a Lorentzian to incorporate the  
456 spectral features. [REFs]

$$\epsilon = \frac{A}{1 + \left(\frac{f-x}{g}\right)^2} + B \cdot f^a \quad (5)$$

457  
458 Where A is the peak intensity, g the half width at half maximum, x1 the centre frequency of the peak,  
459 f the frequency, and a and B are power law parameters. An offset was not observed in any  
460 measurement for which reason no absolute term is present.

461 The THz-TDS spectra of liquid aSyn in the two salts were deconvoluted to investigate the effects of the  
462 salt ions on the solvation shell. The solvation shell size of the single ions was based on the results  
463 obtained from the AIMD simulations. Because the absorption coefficients of the salts without protein  
464 present are known, absorption coefficients of the protein and its solvation shell can be calculated for  
465 different estimates of solvation shell sizes.

$$\epsilon = \epsilon_{bulk} \cdot \frac{V_{bulk}}{V_0} + \epsilon_{ps} \cdot \frac{V_{ps}}{V_0} = \epsilon_{bulk} \cdot \frac{V_{bulk}}{V_0} + \epsilon_p \cdot \frac{V_p}{V_0} + \epsilon_s \cdot \frac{V_s}{V_0} \quad (6)$$

#### 468 **Purification of aSyn for NMR analysis**

469 *E. coli* were grown in isotope-enriched M9 minimal medium containing  $^{15}\text{N}$  ammonium chloride similar  
470 our previous protocol<sup>56</sup>. To isolate expressed aSyn the cell pellets were resuspended in lysis buffer  
471 (10mM Tris-HCl pH 8, 1mM EDTA and EDTA-free complete protease inhibitor cocktail tablets (Roche,  
472 Basel, Switzerland), 0.2 mM phenylmethylsulfonyl fluoride (PMSF) and Pepstatin A) and lysed by  
473 sonication. The cell lysate was centrifuged at 22k x g for 30 min to remove cell debris and the  
474 supernatant was then heated for 20 min at 90 °C to precipitate the heat-sensitive proteins and  
475 subsequently centrifuged at 22k x g. Streptomycin sulfate 10mg/ml was added to the supernatant to  
476 precipitate DNA. The mixture was stirred for 15 min followed by centrifugation at 22k x g, then  
477 repeated. Ammonium sulfate 360 mg/ml was added to the supernatant precipitate the protein aSyn.  
478 The solution was stirred for 30 min and centrifuged again at 22k x g. The resulting pellet was  
479 resuspended in 25mM Tris-HCl, pH 7.7 and dialyzed overnight. The protein was purified by IEX on a

480 HiPrep Q FF anion exchange column (GE Healthcare) and then further purified by SEC on a HiLoad  
481 16/60 Superdex 75 prep grade column (GE Healthcare). All the fractions containing the monomeric  
482 protein were pooled together and concentrated using amicon 10 k MWCO centrifugal filtration  
483 devices (Merck). Protein purity was determined by aRP to be 88.6% (Supplementary Figure 8). aSyn  
484 was buffer exchanged into 5% D<sub>2</sub>O and 95% H<sub>2</sub>O using PD10 desalting columns (GE Healthcare). CsI  
485 and NaCl were added to a final concentration of 150 mM and 1.5 M just before performing the  
486 experiments.

#### 487 **Nuclear Magnetic Resonance Spectroscopy**

488 NMR spectra were recorded as 2D <sup>15</sup>N HSQC at 298 K on a Bruker AV800 spectrometer (800 MHz <sup>1</sup>H)  
489 equipped with a 5 mm TXI HCN/z cryoprobe. Increase in salt concentration from 150 mM to 1.5 M  
490 resulted in an intrinsic signal intensity loss of 2.25x for NaCl and CsI, due to increased lossiness of the  
491 sample. Accordingly, spectra recorded at 1.5 M salt were multiplied by a factor of 2.25x prior to  
492 intensity analysis. Experiments were recorded with 2 scans per free induction decay with 150 and 1024  
493 complex pairs in <sup>15</sup>N and <sup>1</sup>H, respectively.

#### 494 **Native nano-electrospray ionization mass spectrometry (nano-ESI-MS) and ion mobility (IM)**

495 aSyn was buffer exchanged into 20 mM ammonium acetate (Sigma Aldrich, St. Louis, MO, USA) pH 7  
496 using PD 10 columns (GE Healthcare) and diluted to a final concentration of 20 μM. NaCl (Acros  
497 Organics, New Jersey, USA) or CsI (Sigma Aldrich, St. Louis, MO, USA) were dissolved in water and  
498 added to the sample with a final concentration between 80 μM and 5 mM, which corresponds to a  
499 1:4, 1:50 and 1:250 aSyn:Na/Cs ratio. The samples were incubated for ten minutes at room  
500 temperature before analysis. A Synapt G2 HDMS (Waters, Manchester, UK) was used to perform the  
501 nano-ESI (ion mobility-) mass spectrometry (nano-ESI-IM-MS) measurements. The results were  
502 analysed using Masslynx version 4.1 (Waters, Manchester, UK). Infusion of the samples into the mass  
503 spectrometer was performed using home-made gold-coated borosilicate capillaries. The main  
504 instrumental settings were: capillary voltage 1.5-1.8 kV; sampling cone 25 V; extraction cone 1 V; trap  
505 CE 4 V; transfer CE 0 V; trap bias 40 V. Gas pressures used throughout the instrument were: source  
506 2.75 mbar; trap cell 2.3 x 10<sup>-2</sup> mbar; IM cell 3.0 mbar; transfer cell 2.5 x 10<sup>-2</sup> mbar. In mass spectra of  
507 the aSyn + CsI sample there are low intensity Na<sup>+</sup> adducts remaining bound in spite of buffer exchange.

#### 508 **Terahertz time domain spectroscopy (THz-TDS) of solid samples**

509 aSyn (2.2 mg/ml) was buffer exchanged into 1.5 M NaCl or 1.5 M CsI in H<sub>2</sub>O using PD10 desalting  
510 columns. The samples were snap frozen in liquid nitrogen and lyophilised using a LyoQuest 85 freeze-  
511 dryer (Telstar, Spain). The samples were prepared into pellets between 300–600 μm in thickness as

512 outlined previously<sup>57</sup>. This sample was sandwiched between the two z-cut quartz windows and sealed  
513 in the sample holder. The THz-TDS spectra were acquired using a commercial TeraPulse 4000  
514 instrument across a spectral range of 0.2–2.7 THz (TeraView, Cambridge, UK). The experiments were  
515 conducted over a range of temperatures (100–390 K) using a continuous flow cryostat with liquid  
516 nitrogen as the cryogen (Janis ST-100, Wilmington MA, USA) as outlined previously<sup>57</sup>. In order to  
517 calculate the absorption coefficient and the refractive index of the sample a modified method for  
518 extracting the optical constants from terahertz measurements based on the concept introduced by  
519 Duvillaret et al. was used<sup>58,59</sup>. The changes in sample dynamics were analysed by investigating the  
520 change in the absorption coefficient at a frequency of 1 THz and as a function of temperature. We  
521 have previously demonstrated that discontinuities in the temperature dependent absorption data in  
522 disordered materials can be used to highlight changes in the molecular dynamics and implemented a  
523 rigorous fitting routine based on statistical analysis to analyse the data outlined.

524 **Supporting Information.** Data for purity of aSyn samples, analytical SEC to determine remaining  
525 monomer concentration after ThT-based kinetic assays, AFM data for the morphology of aSyn fibrils,  
526 additional SANS data analysis, additional nano-ESI-MS data, additional nano-ESI-IM-MS data,  
527 additional NMR data. Raw data is available at the University of Cambridge Repository. The SANS  
528 experiment at the ISIS Neutron and Muon Source was allocated under the beamtime XB1890203 (DOI:  
529 <http://doi.org/10.5286/ISIS.E.RB1890203-1>).

### 530 **Author Information**

#### 531 **Corresponding Author**

532 Gabriele S. Kaminski Schierle, [gsk20@cam.ac.uk](mailto:gsk20@cam.ac.uk)

#### 533 **Author Contributions**

534 A.D.S. and G.S.K.S. conceived the project and designed experiments. A.D.S purified protein for all  
535 experiments, performed kinetic aggregation assays and AFM. N.M. performed SANS experiments, N.M  
536 and T.M analysed SANS data. MD simulations were performed by M.T.R. J.K. performed solution THz-  
537 TDS experiments. R.M. performed nano-ESI-MS and nano-ESI-IM-MS experiments. D.N. performed  
538 NMR experiments. T.S. performed solid THz-TDS experiments. All authors contributed to editing the  
539 manuscript and have given approval to the final version of the manuscript.

#### 540 **Notes**

541 The authors declare no competing financial interest.

#### 542 **Acknowledgments**

543 G.S.K.S. acknowledges funding from the Wellcome Trust (065807/Z/01/Z) (203249/Z/16/Z), the UK  
544 Medical Research Council (MRC) (MR/K02292X/1), Alzheimer Research UK (ARUK) (ARUK-PG013-14),  
545 Michael J Fox Foundation (16238) and Infinitus China Ltd. A.D.S. acknowledges Alzheimer Research UK  
546 for travel grants. M.T.R. and J.A.Z. acknowledge funding from EPSRC UK (EP/N022769/1). J.K. and J.A.Z.  
547 acknowledge funding from EPSRC (EP/S023046/1) and AstraZeneca. This work benefitted from  
548 SasView software, originally developed by the DANSE project under NSF award DMR-0520547.

## 549 **References:**

- 550 1. Aoki, K., Shiraki, K. & Hattori, T. Salt effects on the picosecond dynamics of lysozyme  
551 hydration water investigated by terahertz time-domain spectroscopy and an insight into the  
552 Hofmeister series for protein stability and solubility. *Phys. Chem. Chem. Phys.* **18**, 15060–  
553 15069 (2016).
- 554 2. Beece, D. *et al.* *Solvent Viscosity and Protein Dynamics. Biochemistry* **19**, (UTC, 1980).
- 555 3. Dahanayake, J. N. & Mitchell-Koch, K. R. How Does Solvation Layer Mobility Affect Protein  
556 Structural Dynamics? *Front. Mol. Biosci.* **5**, 65 (2018).
- 557 4. Breiten, B. *et al.* Water networks contribute to enthalpy/entropy compensation in protein-  
558 ligand binding. *J. Am. Chem. Soc.* **135**, 15579–15584 (2013).
- 559 5. Gallat, F. *et al.* Dynamical Coupling of Intrinsically Disordered Proteins and Their Hydration  
560 Water: Comparison with Folded Soluble and Membrane Proteins. *Biophysj* **103**, 129–136  
561 (2012).
- 562 6. Thirumalai, D., Reddy, G. & Straub, J. E. Role of Water in Protein Aggregation and Amyloid  
563 Polymorphism. *Acc. Chem. Res.* **45**, 83–92 (2012).
- 564 7. Smith, J. D., Saykally, R. J. & Geissler, P. L. The effects of dissolved halide anions on hydrogen  
565 bonding in liquid water. *J. Am. Chem. Soc.* **129**, 13847–13856 (2007).
- 566 8. Urbic, T. Ions increase strength of hydrogen bond in water. *Chem. Phys. Lett.* **610–611**, 159–  
567 162 (2014).
- 568 9. Chen, Y. *et al.* Electrolytes induce long-range orientational order and free energy changes in  
569 the H-bond network of bulk water. *Sci. Adv.* **2**, e1501891 (2016).
- 570 10. Chen, Y., Okur, H. I., Liang, C. & Roke, S. Orientational ordering of water in extended  
571 hydration shells of cations is ion-specific and is correlated directly with viscosity and  
572 hydration free energy. *Phys. Chem. Chem. Phys.* **19**, 24678–24688 (2017).
- 573 11. Bajaj, P., Richardson, J. O. & Paesani, F. Ion-mediated hydrogen-bond rearrangement through  
574 tunnelling in the iodide–dihydrate complex. *Nat. Chem.* **11**, 367–374 (2019).
- 575 12. Sobott, F., Wattenberg, A., Barth, H. D. & Brutschy, B. Ionic clathrates from aqueous solutions  
576 detected with laser induced liquid beam ionization/desorption mass spectrometry. *Int. J.*  
577 *Mass Spectrom.* **185**, 271–279 (1999).
- 578 13. Binolfi, A. *et al.* Interaction of  $\alpha$ -synuclein with divalent metal ions reveals key differences: A  
579 link between structure, binding specificity and fibrillation enhancement. *J. Am. Chem. Soc.*  
580 **128**, 9893–9901 (2006).
- 581 14. Hoyer, W. *et al.* Dependence of  $\alpha$ -synuclein aggregate morphology on solution conditions. *J.*

- 582 *Mol. Biol.* **322**, 383–393 (2002).
- 583 15. Biancalana, M. & Koide, S. Molecular mechanism of Thioflavin-T binding to amyloid fibrils.  
584 *Biochim. Biophys. Acta - Proteins Proteomics* **1804**, 1405–1412 (2010).
- 585 16. Li, D. *et al.* Structure-Based Design of Functional Amyloid Materials. *J. Am. Chem. Soc.* **136**,  
586 18044–18051 (2014).
- 587 17. Srivastava, K. R. & Lapidus, L. J. Prion protein dynamics before aggregation. *Proc. Natl. Acad. Sci.* **114**, 3572–3577 (2017).  
588
- 589 18. Heugen, U. *et al.* Solute-induced retardation of water dynamics probed directly by terahertz  
590 spectroscopy. *Proc. Natl. Acad. Sci.* **103**, 12301–12306 (2006).
- 591 19. Tielrooij, K. J., Hunger, J., Buchner, R., Bonn, M. & Bakker, H. J. Influence of concentration and  
592 temperature on the dynamics of water in the hydrophobic hydration shell of  
593 tetramethylurea. *J. Am. Chem. Soc.* **132**, 15671–15678 (2010).
- 594 20. Born, B., Weingärtner, H., Bründermann, E. & Havenith, M. Solvation dynamics of model  
595 peptides probed by terahertz spectroscopy. observation of the onset of collective network  
596 motions. *J. Am. Chem. Soc.* **131**, 3752–3755 (2009).
- 597 21. Ebbinghaus, S. *et al.* An extended dynamical hydration shell around proteins. *Proc. Natl. Acad. Sci.* **104**, 20749–20752 (2007).  
598
- 599 22. Konijnenberg, A., Butterer, A. & Sobott, F. Native ion mobility-mass spectrometry and related  
600 methods in structural biology. *Biochimica et Biophysica Acta - Proteins and Proteomics* **1834**,  
601 1239–1256 (2013).
- 602 23. Konijnenberg, A. *et al.* Opposite Structural Effects of Epigallocatechin-3-gallate and Dopamine  
603 Binding to  $\alpha$ -Synuclein. *Anal. Chem.* **88**, 8468–8475 (2016).
- 604 24. Moons, R. *et al.* Metal ions shape  $\alpha$ -synuclein. *Sci. Rep.* **10**, 16293 (2020).
- 605 25. Ruggiero, M. T. *et al.* The significance of the amorphous potential energy landscape for  
606 dictating glassy dynamics and driving solid-state crystallisation. *Phys. Chem. Chem. Phys.* **19**,  
607 30039–30047 (2017).
- 608 26. Sheu, S. Y., Schlag, E. W., Selzle, H. L. & Yang, D. Y. Molecular dynamics of hydrogen bonds in  
609 protein-D<sub>2</sub>O: The solvent isotope effect. *J. Phys. Chem. A* **112**, 797–802 (2008).
- 610 27. Soper, A. K. & Benmore, C. J. Quantum differences between heavy and light water. *Phys. Rev. Lett.* **101**, (2008).  
611
- 612 28. Houston, L. L., Odell, J., Lee, Y. C. & Himes, R. H. Solvent isotope effects on microtubule  
613 polymerization and depolymerization. *J. Mol. Biol.* **87**, 141–146 (1974).
- 614 29. Uratani, Y. *Polymerization of Salmonella flagellin in water and deuterium oxide media. Journal of Biochemistry* **75**, (1974).  
615
- 616 30. Itoh, T. J. & Sato, H. The effects of deuterium oxide ( 2 H 2 O ) on the polymerization of tubulin  
617 in vitro. *BBA - Gen. Subj.* **800**, 21–27 (1984).
- 618 31. Cioni, P. & Strambini, G. B. Effect of heavy water on protein flexibility. *Biophys. J.* **82**, 3246–  
619 3253 (2002).
- 620 32. Cho, Y. *et al.* Hydrogen bonding of  $\beta$ -turn structure is stabilized in D<sub>2</sub>O. *J. Am. Chem. Soc.* **131**,  
621 15188–15193 (2009).

- 622 33. Munishkina, L. A., Henriques, J., Uversky, V. N. & Fink, A. L. Role of Protein-Water Interactions  
623 and Electrostatics in  $\alpha$ -Synuclein Fibril Formation. *Biochemistry* **43**, 3289–3300 (2004).
- 624 34. Ahmad, B., Chen, Y. & Lapidus, L. J. Aggregation of  $\alpha$ -synuclein is kinetically controlled by  
625 intramolecular diffusion. *Proc. Natl. Acad. Sci. U. S. A.* **109**, 2336–41 (2012).
- 626 35. Cho, M. K. *et al.* Structural characterization of  $\alpha$ -synuclein in an aggregation prone state.  
627 *Protein Sci.* **18**, 1840–1846 (2009).
- 628 36. Srivastava, K. R., French, K. C., Tzul, F. O., Makhatadze, G. I. & Lapidus, L. J. Intramolecular  
629 diffusion controls aggregation of the PAPf39 peptide. *Biophys. Chem.* **216**, 37–43 (2016).
- 630 37. Arya, S. *et al.* Femtosecond Hydration Map of Intrinsically Disordered  $\alpha$ -Synuclein. *Biophys. J.*  
631 **114**, 2540–2551 (2018).
- 632 38. Wu, K.-P., Kim, S., Fela, D. A. & Baum, J. Characterization of Conformational and Dynamic  
633 Properties of Natively Unfolded Human and Mouse  $\alpha$ -Synuclein Ensembles by NMR:  
634 Implication for Aggregation. *J. Mol. Biol.* **378**, 1104–1115 (2008).
- 635 39. Reissigl, H. Wasser- und Elektrolythaushalt. in *International Journal for Vitamin and Nutrition*  
636 *Research* **12**, 87–108 (Springer, Berlin, Heidelberg, 1972).
- 637 40. Petukh, M. & Alexov, E. Ion binding to biological macromolecules. *Asian J. Phys. an Int. Q.*  
638 *Res. J.* **23**, 735–744 (2014).
- 639 41. Sharma, A. *et al.* Determinants of Cross-Species Prion Transmission Contributions of the Prion  
640 Protein Sequence, Strain and Environment to the Species Barrier. *J. Biol. Chem.* **291**, 1277–  
641 1288 (2016).
- 642 42. Yeh, V. *et al.* The Hofmeister effect on amyloid formation using yeast prion protein. *Protein*  
643 *Sci.* **19**, 47–56 (2010).
- 644 43. Stephens, A. D. *et al.* Different Structural Conformers of Monomeric  $\alpha$ -Synuclein Identified  
645 after Lyophilizing and Freezing. *Anal. Chem.* **90**, 6975–6983 (2018).
- 646 44. Heenan, R. K., Penfold, J. & King, S. M. *SANS at Pulsed Neutron Sources: Present and Future*  
647 *Prospectst. J. Appl. Cryst* **30**, (1997).
- 648 45. Carsughi, F., Bellmann, D., Kulda, J., Magnani, M. & Stefanon, M. *Absolute Calibration of*  
649 *Small-Angle Neutron Scattering Data of a Double-Crystal Diffractometer. Journal of Applied*  
650 *Crystallography* **30**, (1997).
- 651 46. Hammouda, B. A new Guinier-Porod model. *J. Appl. Cryst* **43**, 716–719 (2010).
- 652 47. VandeVondele, J. & Hutter, J. Gaussian basis sets for accurate calculations on molecular  
653 systems in gas and condensed phases. *J. Chem. Phys.* **127**, 114105 (2007).
- 654 48. VandeVondele, J. *et al.* Quickstep: Fast and accurate density functional calculations using a  
655 mixed Gaussian and plane waves approach. *Comput. Phys. Commun.* **167**, 103–128 (2005).
- 656 49. Perdew, J. P., Burke, K. & Ernzerhof, M. Generalized Gradient Approximation Made Simple.  
657 *Phys. Rev. Lett.* **77**, 3865–3868 (1996).
- 658 50. Grimme, S., Antony, J., Ehrlich, S. & Krieg, H. A consistent and accurate *ab initio*  
659 parametrization of density functional dispersion correction (DFT-D) for the 94 elements H-Pu.  
660 *J. Chem. Phys.* **132**, 154104 (2010).
- 661 51. Grimme, S., Ehrlich, S. & Goerigk, L. Effect of the damping function in dispersion corrected  
662 density functional theory. *J. Comput. Chem.* **32**, 1456–1465 (2011).

- 663 52. Nosé, S. A unified formulation of the constant temperature molecular dynamics methods. *J.*  
664 *Chem. Phys.* **81**, 511–519 (1984).
- 665 53. Nosé, S. A molecular dynamics method for simulations in the canonical ensemble. *Mol. Phys.*  
666 **52**, 255–268 (1984).
- 667 54. Martyna, G. J., Klein, M. L. & Tuckerman, M. Nosé–Hoover chains: The canonical ensemble via  
668 continuous dynamics. *J. Chem. Phys.* **97**, 2635–2643 (1992).
- 669 55. Li, D. *et al.* Structure-based design of functional amyloid materials. *J. Am. Chem. Soc.* **136**,  
670 18044–18051 (2014).
- 671 56. Fusco, G. *et al.* Structural basis of synaptic vesicle assembly promoted by  $\alpha$ -synuclein. *Nat.*  
672 *Commun.* **7**, 12563 (2016).
- 673 57. Shmool, T. A. & Zeitler, J. A. Insights into the structural dynamics of poly lactic- co -glycolic  
674 acid at terahertz frequencies. *Polym. Chem.* **10**, 351–361 (2019).
- 675 58. Duvillaret, L., Garet, F. & Coutaz, J.-L. A reliable method for extraction of material parameters  
676 in terahertz time-domain spectroscopy. *IEEE J. Sel. Top. Quantum Electron.* **2**, 739–746  
677 (1996).
- 678 59. Sibik, J. & Zeitler, J. A. Terahertz response of organic amorphous systems: experimental  
679 concerns and perspectives. *Philos. Mag.* **96**, 842–853 (2016).
- 680 60. Pedersen, J. S. & Schurtenberger, P. Scattering functions of semiflexible polymers with and  
681 without excluded volume effects. *Macromolecules* **29**, 7602–7612 (1996).
- 682 61. Allison, J. R., Rivers, R. C., Christodoulou, J. C., Vendruscolo, M. & Dobson, C. M. A  
683 Relationship between the Transient Structure in the Monomeric State and the Aggregation  
684 Propensities of  $\alpha$ -Synuclein and  $\beta$ -Synuclein. **53**, 7183 (2014).

685

686

687

688

689

690

691

692

693

694

695

696

697

698



699  
700  
701

## The role of water mobility in protein misfolding

### Supplementary Information

#### Contents

|                                                                                                                                                                                                                                                             |    |
|-------------------------------------------------------------------------------------------------------------------------------------------------------------------------------------------------------------------------------------------------------------|----|
| <b>Supplementary Figure 1.</b> aSyn aggregation kinetics are enhanced in the presence of D <sub>2</sub> O and increasing concentrations of NaCl.....                                                                                                        | 2  |
| <b>Supplementary Figure 2.</b> Identification of flat and twisted aSyn fibril polymorphs by AFM.....                                                                                                                                                        | 3  |
| <b>Supplementary Figure 3.</b> Representative analytical size exclusion chromatograph of remaining aSyn monomer after ThT-based assays .....                                                                                                                | 4  |
| <b>Supplementary Figure 4.</b> Model fits to the SANS data using the Guinier-Porod model .....                                                                                                                                                              | 5  |
| <b>Supplementary Table 1.</b> Parameters of fitting SANS data presented in Figure 2 e,f. These results were obtained using a flexible cylinder model. The cylinder length fitted is not included as it is not detectable with the experimental q-range..... | 6  |
| <b>Supplementary Table 2.</b> Parameters of fitting SANS data presented in Supplementary Figure 4.....                                                                                                                                                      | 7  |
| <b>Supplementary Note 1:</b> Discussion of SANS data fitted with different models.....                                                                                                                                                                      | 8  |
| <b>Supplementary Figure 5.</b> Radial pair distribution functions extracted from AIMD simulations.....                                                                                                                                                      | 9  |
| <b>Supplementary Figure 6.</b> Absorption in the solvation shell excluding the protein itself is compared to bulk absorption at 1 THz.....                                                                                                                  | 10 |
| <b>Supplementary Note 2:</b> Discussion of nano-ESI-MS spectra.....                                                                                                                                                                                         | 11 |
| <b>Supplementary Figure 7.</b> Detection of aSyn bound to NaCl and CsI at a 1:250 ratio.....                                                                                                                                                                | 11 |
| <b>Supplementary Note 3:</b> Discussion of nano-ESI-IM-MS spectra .....                                                                                                                                                                                     | 12 |
| <b>Supplementary Figure 8.</b> aSyn is compact at lower charge states and extended at higher charge states in the absence of an in increasing concentrations of NaCl and CsI .....                                                                          | 12 |
| <b>Supplementary Figure 9.</b> Intensity signal of <sup>1</sup> H and <sup>15</sup> N-labelled aSyn in 150 mM NaCl is slightly higher than in 150 mM CsI.....                                                                                               | 13 |
| <b>Supplementary Figure 10.</b> Highly pure monomeric aSyn is isolated by liquid chromatography, as shown by a representative Coomassie blue stained gel and analytical RP .....                                                                            | 14 |

702  
703  
704  
705  
706  
707  
708

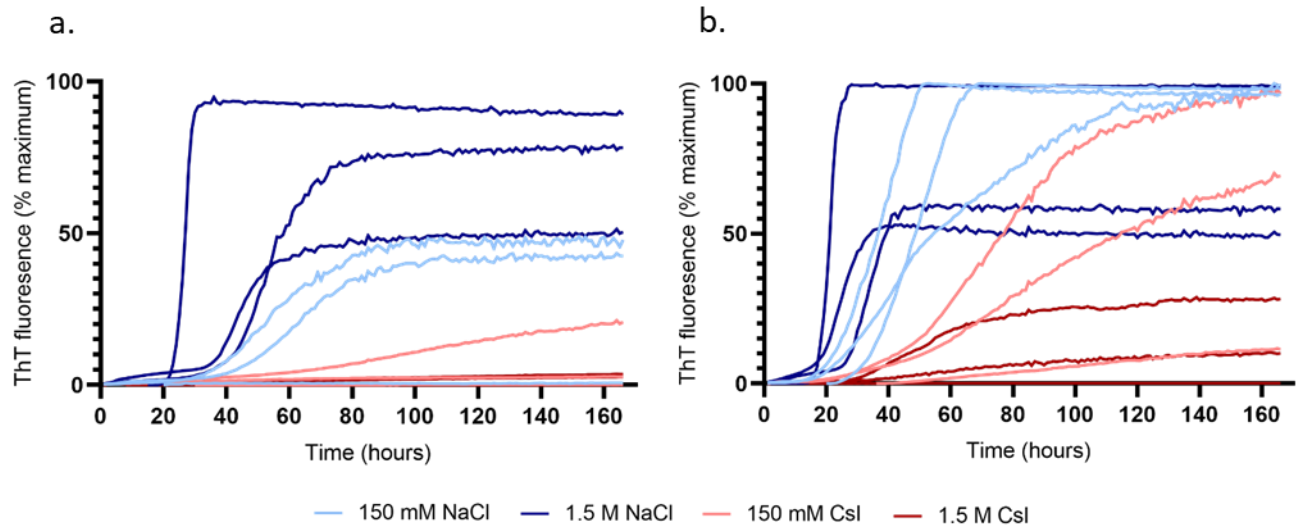

709

710 **Supplementary Figure 1. aSyn aggregation kinetics are enhanced in the presence of D<sub>2</sub>O and**  
711 **increasing concentrations of NaCl** aSyn aggregation kinetics were measured by ThT  
712 fluorescence; 50 μM aSyn was incubated with 10 μM ThT in a 384 well plate with continuous  
713 orbital shaking for 160 hours in the presence of (a) H<sub>2</sub>O and (b) D<sub>2</sub>O with 150 mM NaCl (red),  
714 1.5 M NaCl (brown), 150 mM CsI (blue), 1.5 M CsI (navy) and plotted as % maximum ThT  
715 fluorescence over time. Increased NaCl concentrations accelerated aSyn aggregation, while  
716 increased CsI concentrations decelerated aSyn aggregation. The aggregation rate in D<sub>2</sub>O was  
717 enhanced compared to H<sub>2</sub>O. Three plate repeats are shown for each condition, the data  
718 presented are the average of four wells per condition.

719

720

721

722

723

724

725

726

727

728

729

730

731

732

733

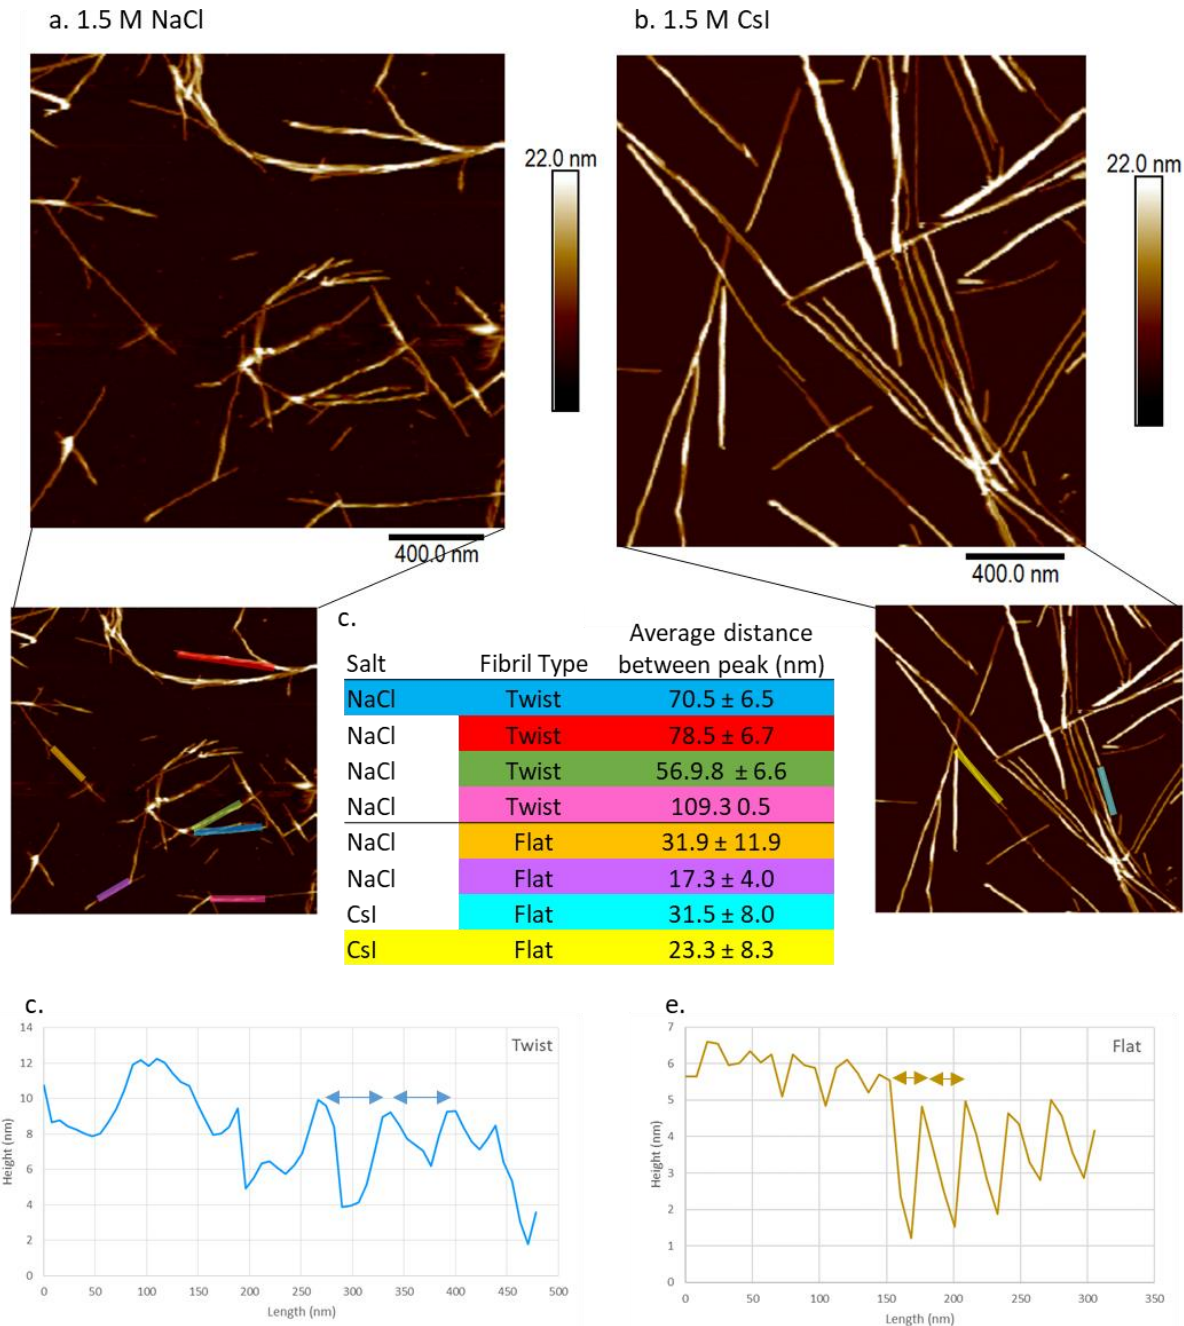

734

735 **Supplementary Figure 2. Identification of flat and twisted aSyn fibril polymorphs by AFM**  
 736 aSyn fibrils formed during ThT-based assays were imaged on freshly cleaved mica and  
 737 representative images are shown for different fibril polymorphs, 'twisted' containing a helical  
 738 pitch and 'flat' with no visible helical pitch in (A.) 1.5 M NaCl in D<sub>2</sub>O and (B.) flat only 1.5 M  
 739 CsI in D<sub>2</sub>O. Insets with coloured lines correspond to the colours in the table and show regions  
 740 where fibril height was analysed. (C.) Table listing salt conditions, fibril type and distance  
 741 measured between fibril peaks. Distances between peaks were calculated based on height  
 742 profiles determined in the Nanoscope analysis software and are represented in (D.) for twisted  
 743 fibrils with peak distances between 57-109 nm and (E.) flat fibrils with peak distances between  
 744 17 – 32 nm. The colours of the graph of peak heights in (D. + E.) correspond to the top blue  
 745 twisted fibril and the bottom yellow flat fibril highlighted in table C and in the inserts of A and  
 746 B.

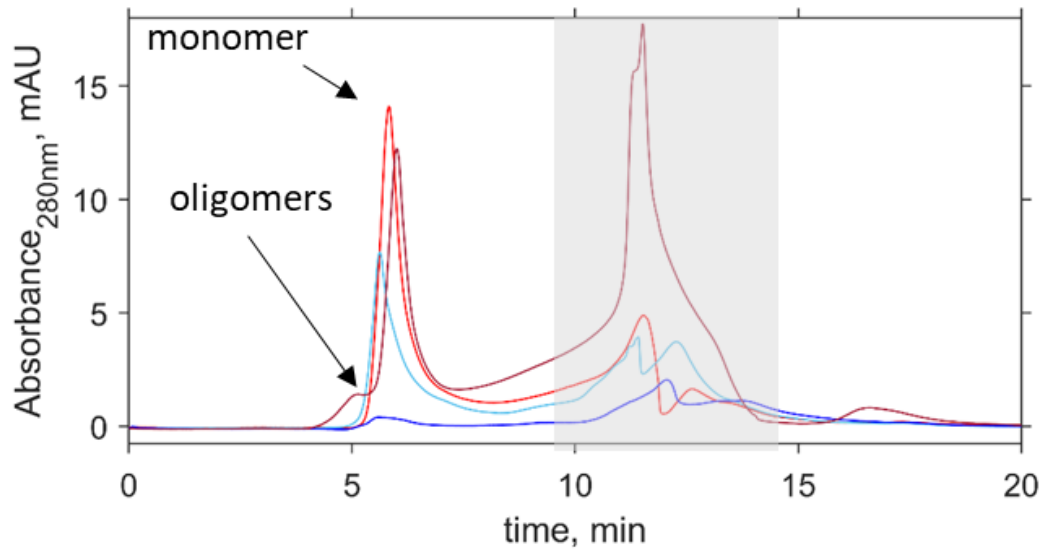

747

748 **Supplementary Figure 3. Representative analytical size exclusion chromatograph of**  
749 **remaining aSyn monomer after ThT-based assays** The content of each well after ThT-based  
750 assays was centrifuged and the remaining monomer analysed by analytical SEC-HPLC on an  
751 AdvanceBio 130Å column at a flow rate of 1 mL/min in 20 mM Tris pH 7.2 and monitored by  
752 absorbance at 280 nm. The area under the curve of the monomeric aSyn, which eluted ~ 5.2  
753 minutes, was used to calculate the remaining monomer from known concentrations of aSyn.  
754 Representative chromatographs for aSyn in 150 mM NaCl (light blue, 1.5 M NaCl (dark blue),  
755 150 mM CsI (red), 1.5 M CsI (dark red) are shown. Oligomeric species eluted before the  
756 monomer and can be detected in the 1.5 M CsI trace (dark red). Elution time for aSyn shifts  
757 slightly dependent on the salt and concentration present. The presence of salt is also detected  
758 in the grey region.

759

760

761

762

763

764

765

766

767

768

769

770

771

772

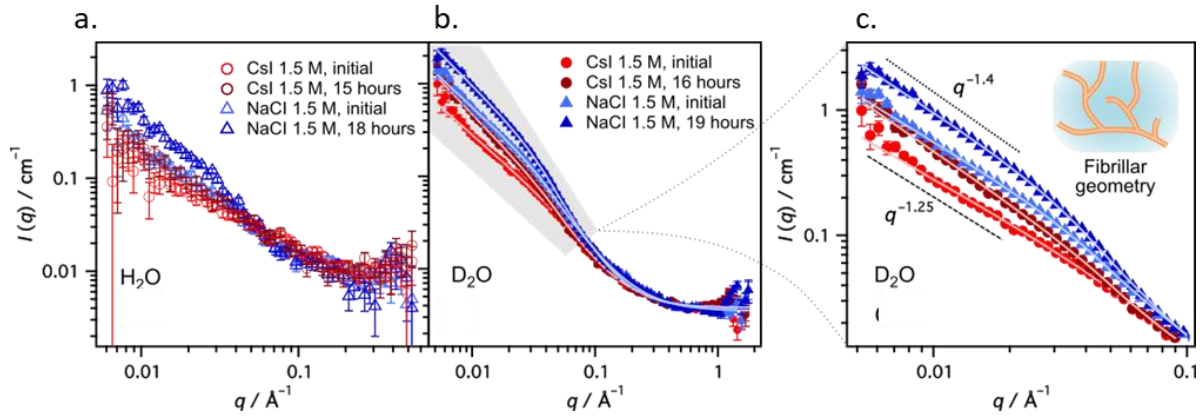

773

774 **Supplementary Figure 4. Model fits to the SANS data using the Guinier-Porod model.** SANS data for  
775 solutions of 434  $\mu\text{M}$  aSyn in either 1.5 M NaCl or Csl in  $\text{H}_2\text{O}$  (a) and  $\text{D}_2\text{O}$  (b). The aSyn in  $\text{H}_2\text{O}$  samples  
776 had high scattering, therefore the model was fit to  $\text{D}_2\text{O}$  data only. In c, solid symbols indicate  
777 experimental scattering data and solid lines represent the model fits. (g) Zoomed-in view of the low  $q$   
778 region in b (shaded area) highlighting the differences in scattering intensity for each sample.  
779 Characteristic slopes are indicated with the data ( $q^{-1.25}$  and  $q^{-1.4}$ ), and the inset has been added to  
780 signify the fibrillar-type structure as determined by the modelling. Fitting values are shown in  
781 Supplementary Table 1.

782

783

784

785

786

787

788

789

790

791

792

793

794

795

796

797

798

799 **Supplementary Table 1. Parameters of fitting SANS data presented in Figure 2 e,f. These results were**  
800 **obtained using a flexible cylinder model. The cylinder length fitted is not included as it is not**  
801 **detectable with the experimental q-range**

802

| Solvent          | Salt | Time     | R (Å)    | b (Å)     | PDI of b    | $\chi^2$ |
|------------------|------|----------|----------|-----------|-------------|----------|
| H <sub>2</sub> O | NaCl | Initial  | 21 ± 3   | 199 ± 116 | 0.95 ± 0.36 | 0.63     |
|                  | NaCl | 18 hours | 27 ± 4   | 116 ± 61  | 0.48 ± 0.18 | 0.8      |
|                  | Csl  | Initial  | 20 ± 0.2 | 480 ± 42  | 0.11 ± 0.14 | 0.78     |
|                  | Csl  | 15 hours | 20 ± 0.9 | 468 ± 72  | 0.38 ± 0.17 | 0.8      |
| D <sub>2</sub> O | NaCl | Initial  | 20 ± 0.1 | 103 ± 14  | 0.65 ± 0.26 | 3.2      |
|                  | NaCl | 19 hours | 22 ± 1.1 | 100 ± 5.7 | 0.99 ± 0.11 | 2.93     |
|                  | Csl  | Initial  | 20 ± 3.9 | 467 ± 111 | 0.91 ± 0.33 | 1.94     |
|                  | Csl  | 16 hours | 23 ± 4.2 | 409 ± 36  | 0.98 ± 0.38 | 2.65     |

803

804

805

806

807

808

809

810

811

812

813

814

815

816

817

818

819

820

821

822 **Supplementary Table 2. Parameters of fitting SANS data presented in Supplementary Figure 4**

| <u>Solvent</u>   | <u>Salt</u> | <u>Time</u> | <u>R (Å)</u> | <u>Dimension variable</u> | <u>Porod exponent</u> |
|------------------|-------------|-------------|--------------|---------------------------|-----------------------|
| D <sub>2</sub> O | NaCl        | Initial     | 19.5         | 1.2                       | 1.95                  |
|                  | NaCl        | 19 hours    | 23.1         | 1.3                       | 2.28                  |
| D <sub>2</sub> O | Csl         | Initial     | 13.5         | 1.16                      | 1.84                  |
|                  | Csl         | 16 hours    | 15.2         | 1.37                      | 1.98                  |

823

824 These results were obtained using the Guinier-Porod model

825

826

827

828

829

830

831

832

833

834

835

836

837

838

839

840

841

842

843

844

845

846

847

848

849

## 850 **Supplementary Note 1**

### 851 Discussion of SANS data fitted with different models

852 The flexible cylinder model (Figure 1e,f, Table S1) gives a radius,  $R$  and, Kuhn length,  $b$ , that describes  
853 the stiffness of the fibril which can be related to shortness of fibril<sup>60</sup>. The fitting using the cylinder  
854 models to the scattering from aSyn in  $D_2O$  show some discrepancy especially at high  $q$ -range,  
855 indicating that other populations (monomers or/and oligomers) might influence the scattering curves  
856 or that fibrils in  $D_2O$  are not perfectly cylindrical. Instead we used a flexible cylinder and a sphere fitting  
857 (Figure 2g, Table 2 main text), to account for the contribution from the fibrils and monomers,  
858 respectively.

859 The Guinier-Porod model (Figure S4, Table S1) gives the radius,  $R$ , and a dimensionality parameter ( $3$   
860  $- s$ ) to help define non-spherical objects, where  $s = 0$  represents spheres or globules,  $s = 1$  represents  
861 cylinders or rods and  $s = 2$  represents lamellae or platelets<sup>41</sup>. Both fits give an average radius of  $\sim 20$   
862  $\text{\AA}$ , but the radius increases over time for all aSyn samples apart from aSyn in  $H_2O$  with CsI. The Guinier-  
863 Porod model shows evidence of monomers in the high  $q$  region and the presence of flexible rod-like  
864 structures where  $s = 1.2-1.4$  (Table S1). The higher slope of the aSyn in NaCl samples in  $D_2O$  at low  $q$   
865 indicates less rigid, i.e. longer aggregates, this is also observed in the cylinder model, where aSyn  
866 structures in NaCl are less rigid (Table 2).

867

868

869

870

871

872

873

874

875

876

877

878

879

880

881

882

883

884

885



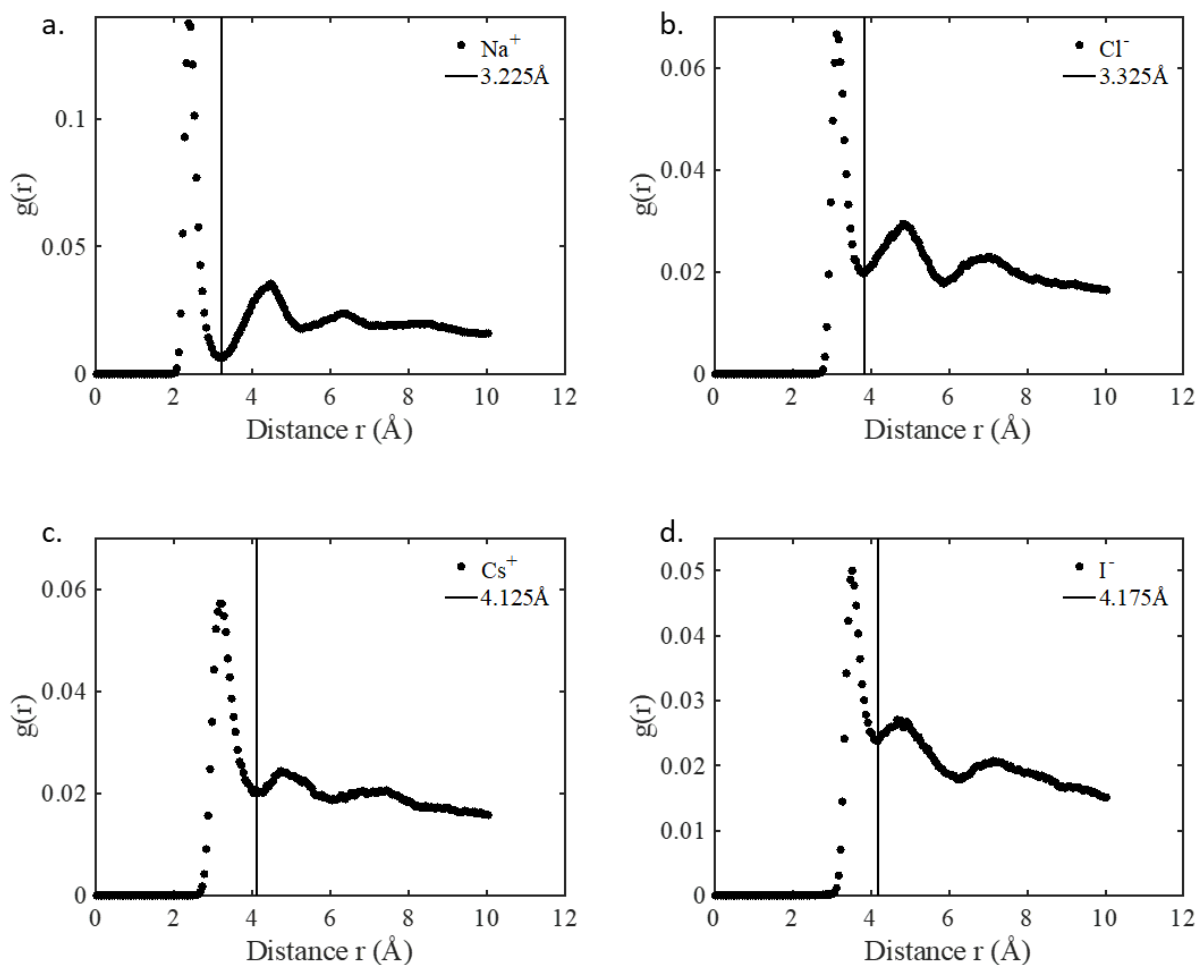

886

887 **Supplementary Figure 5. Radial pair distribution functions extracted from AIMD**  
888 **simulations.** The first minima are used as a measure of the size of the solvation shell around  
889 different salt ions for THz data analysis (a)  $\text{Na}^+$ , (b)  $\text{Cl}^-$ , (c)  $\text{Cs}^+$ , (d)  $\text{I}^-$ . The horizontal line  
890 indicates the distance of solvation shell around each ion.

891

892

893

894

895

896

897

898

899

900

901

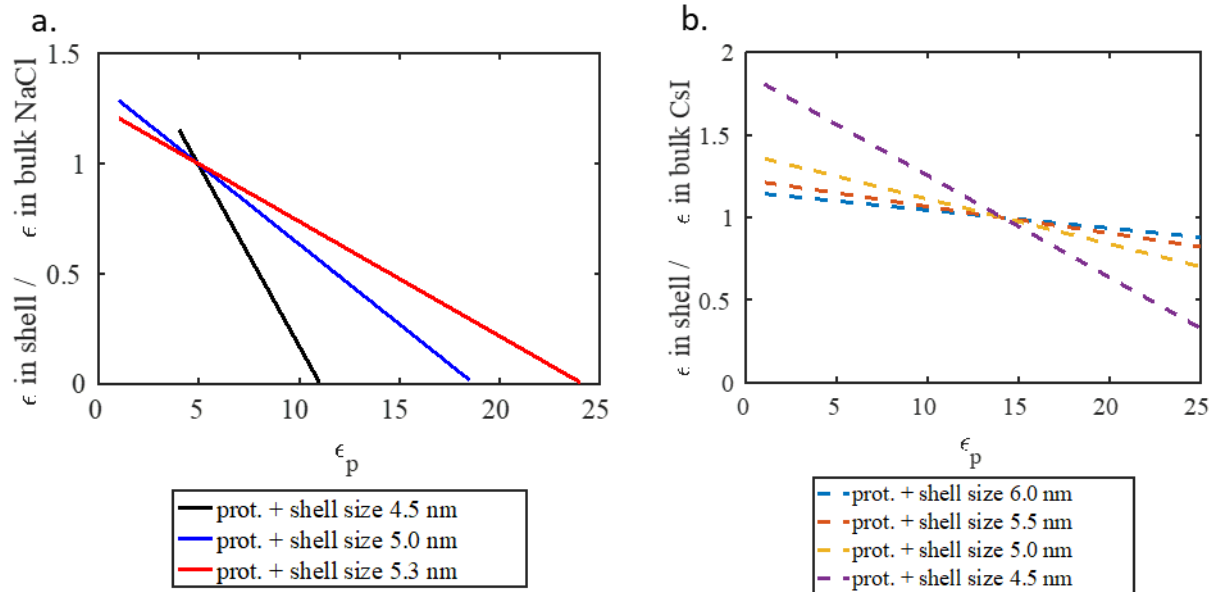

902

903 **Supplementary Figure 6. Absorption in the solvation shell excluding the protein itself is**  
904 **compared to bulk absorption at 1 THz.** Representative ratio of the absorption in the shell  
905 compared to bulk absorption for (a) NaCl and (b) CsI for varying protein absorption ( $\epsilon_p$ )  
906 between 1-25  $\text{cm}^{-1}\text{M}^{-1}$ . The solvation shell with NaCl absorbs less than the bulk above  $\epsilon_p = 5$   
907  $\text{cm}^{-1}\text{M}^{-1}$ , while the solvation shell with CsI absorbs less than the bulk above  $\epsilon_p = 15 \text{ cm}^{-1}\text{M}^{-1}$ .

908

909

910

911

912

913

914

915

916

917

918

919

920

921

922

923 **Supplementary Note 2**

924 Discussion of nano-ESI-MS spectra

925 It is likely that, at higher concentrations, even more  $\text{Cs}^+$  and  $\text{Na}^+$  ions are found to interact with aSyn,  
926 but increasing the salt concentrations in MS experiments leads to strong signal interference  
927 (Supplementary Figure 7). Relatively low intensity  $\text{Na}^+$  adducts can be observed in the aSyn +  $\text{Cs}^+$   
928 spectra (Figure 3a and Supplementary Figure 7), the former are present in the purification buffer and  
929 are residually bound to aSyn after protein purification with a maximum of two  $\text{Na}^+$  bound.

930

931

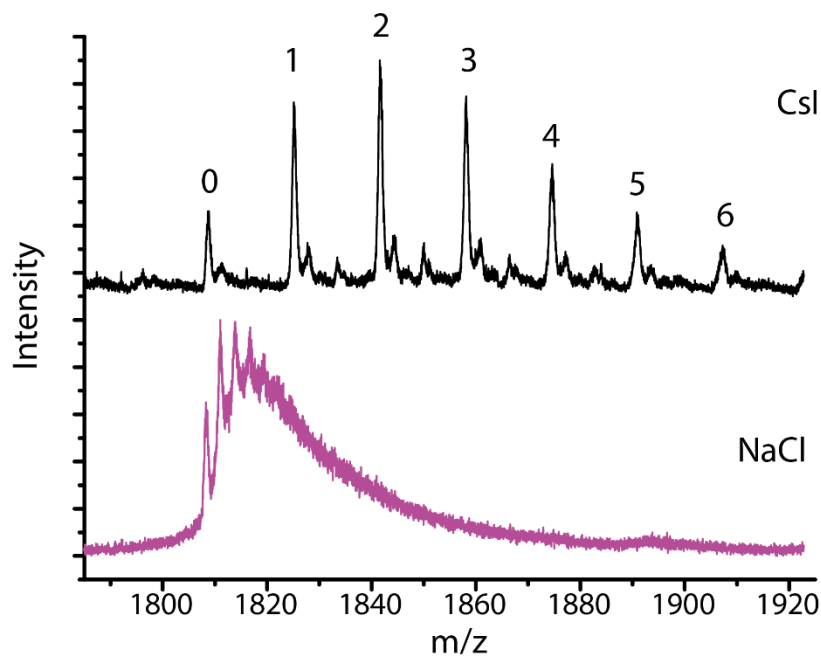

932

933 **Supplementary Figure 7. Detection of aSyn bound to NaCl and CsI at a 1:250 ratio** Nano-ESI-  
934 MS spectra in positive-ion mode for a titration of 20  $\mu\text{M}$  aSyn in 5 mM NaCl (purple) and 5  
935 mM CsI (black). There are more observed ions bound to aSyn at 5 mM compared to 1 mM  
936 (Figure 3a main text). aSyn is bound to six  $\text{Cs}^+$  ions at a 1:250 ratio, but for NaCl the resolution  
937 becomes distorted.

938

939

940

941

942

943

944

945 **Supplementary Note 3**

946 Discussion of of nano-ESI-IM-MS spectra

947 The 8+ charge state was chosen to reflect one of the most physiologically relevant charge state which  
948 resembles conformations present in solution elucidated by NMR (Allison, Rivers, Christodoulou,  
949 Vendruscolo, & Dobson, 2014)<sup>61</sup>; this state has multiple, clearly defined conformations. Higher charge  
950 states e.g. 11+ and up correspond to more extended conformations with higher Coulombic repulsion  
951 (Supplementary Figure 8).

952

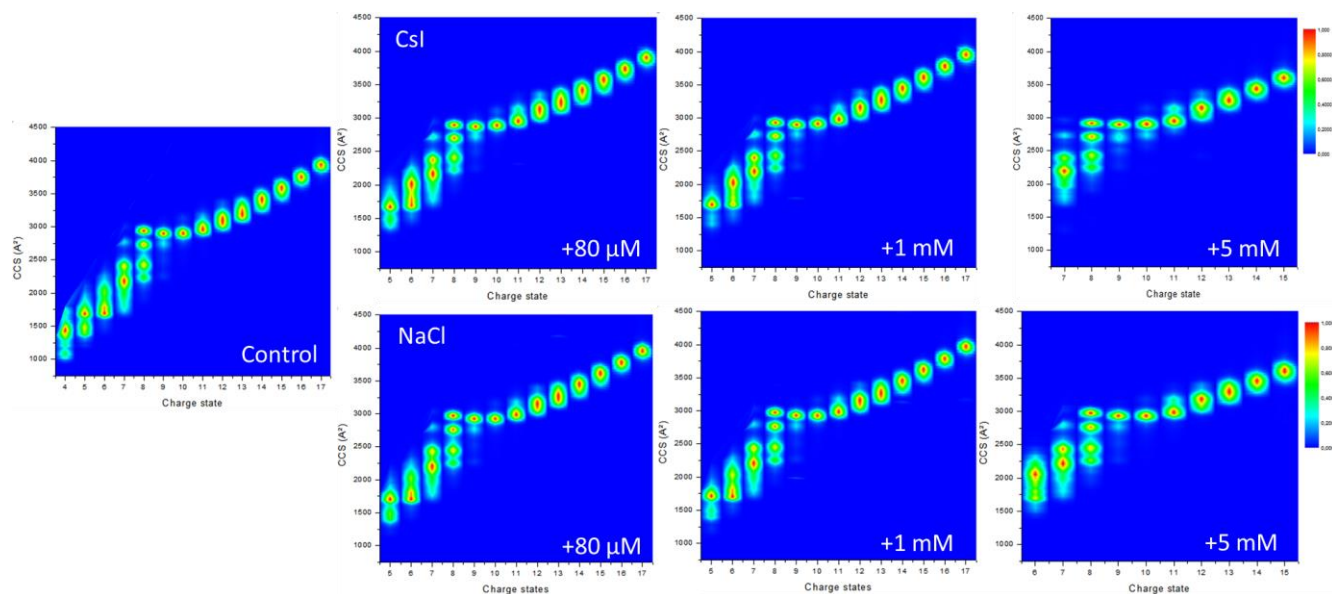

953

954 **Supplementary Figure 8. aSyn is compact at lower charge states and extended at higher charge**  
955 **states in the absence of and with increasing concentrations of NaCl and Csl** CCS plots of nano-ESI-  
956 IM-MS spectra of aSyn at all charge states detected. aSyn in 20 mM ammonium acetate with no salts  
957 (Control) and in the presence of 80  $\mu$ M, 1 mM or 5 mM Csl and NaCl. Higher CCS values show more  
958 extended structures and extended structures are favoured at higher charge states. Shown are  
959 representative CCS plots from three injections of aSyn.

960

961

962

963

964

965

966

967

968

969

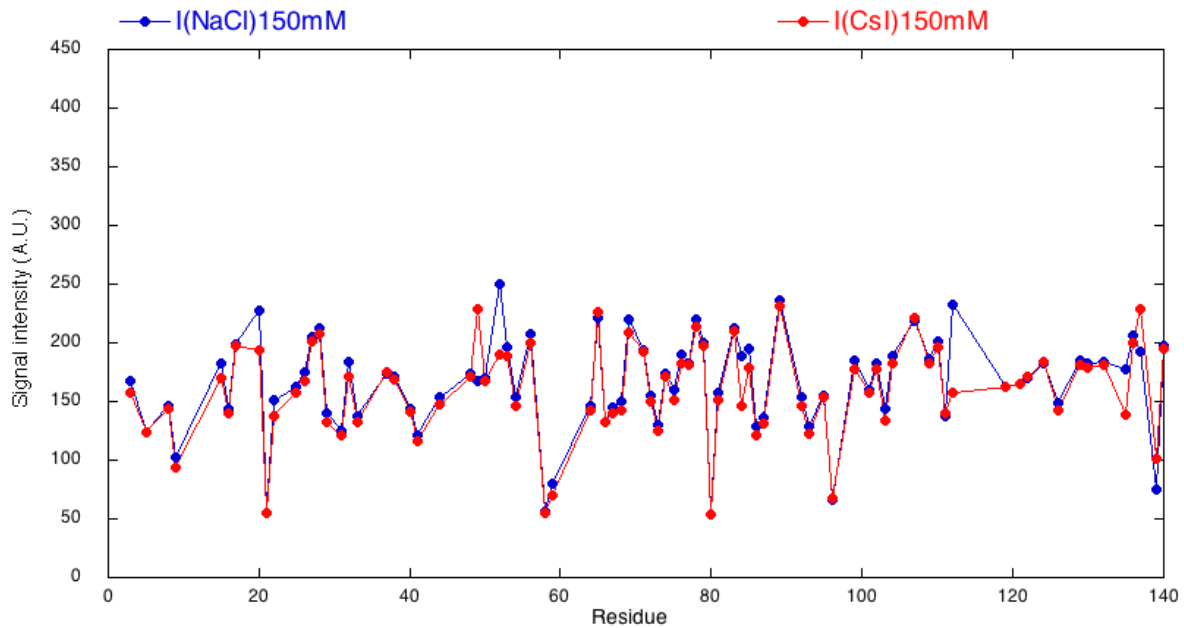

970

971 **Supplementary Figure 9. Intensity signal of  $^1\text{H}$  and  $^{15}\text{N}$ -labelled aSyn in 150 mM NaCl is**  
972 **slightly higher than in 150 mM CsI** HSQC NMR spectroscopy was used to measure the  
973 intensity of 150  $\mu\text{M}$   $^1\text{H}$  and  $^{15}\text{N}$ -labelled aSyn in 95%  $\text{H}_2\text{O}$ , 5%  $\text{D}_2\text{O}$  (vol/vol) in 150 mM CsI  
974 and NaCl. Each residue covered is represented by a spot. The signal intensity of aSyn in 150  
975 mM NaCl is similar, but marginally high than in CsI, indicating less mobility in NaCl.  
976

977

978

979

980

981

982

983

984

985

986

987

988

989

990

991

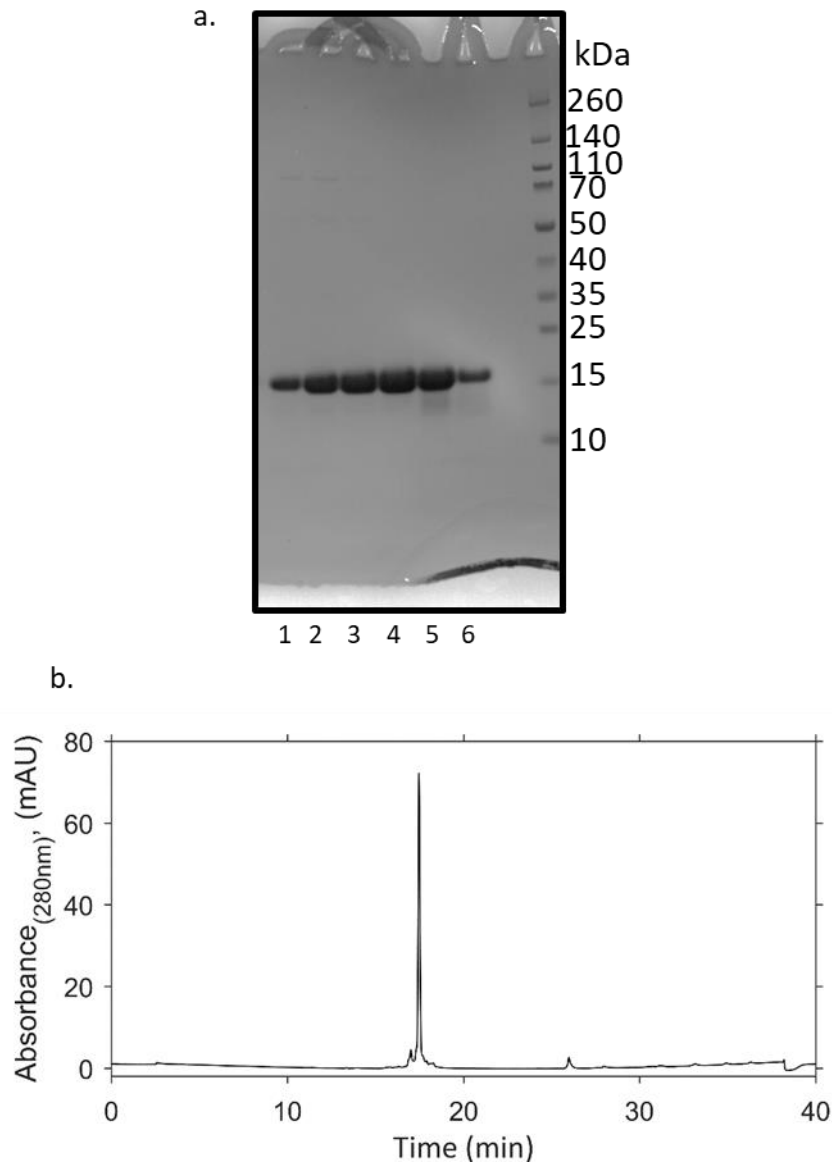

992

993 **Supplementary Figure 10. Highly pure monomeric aSyn is isolated by liquid**  
994 **chromatography, as shown by a representative Coomassie blue stained gel and analytical**

995 **RP (A) <sup>15</sup>N-labelled aSyn after gel filtration, lanes 1-4 were used in experiments as lanes 5-6**

996 **contained degradation products. (B) 50  $\mu$ L <sup>15</sup>N-labelled aSyn was analysed by analytical RP-**

997 **HPLC on a Discovery Bio Wide Pore C18-5 column and eluted using a gradient of 5% acetonitrile + 0.1% acetic acid to 95% acetonitrile + 0.1% acetic acid with H<sub>2</sub>O + 0.1% acetic**

998 **acid over 40 minutes at 1 ml/min. Percentage purity of aSyn was 88.6% based on absorbance**

999 **at 280 nm.**

1000

1001
